# Supplementary material for: Integrative RNA-seq and CLIP-seq analysis reveals hnRNP-F regulation of TNFα/NFκB signaling in high-glucose conditions
Source: Front Physiol. 2025 Sep 9;16:1475441. doi: 10.3389/fphys.2025.1475441 (PMC12454069; doi:10.3389/fphys.2025.1475441)
Supplement: Supplementary file 13 [file Table8.xls]

## Sheet: Up_KEGG_pathway
Term	Database	ID	Input number	Background number	P-Value	Corrected P-Value	Input	Hyperlink	img
Legionellosis	KEGG PATHWAY	hsa05134	8	55	2.57928e-05	0.0060871	HSPA2|CASP1|HSPA8|HSPA1A|HSPA1B|CD14|TLR4|MYD88	http://www.genome.jp/kegg-bin/show_pathway?hsa05134/hsa:834%09red/hsa:3304%09red/hsa:7099%09red/hsa:3306%09red/hsa:3312%09red/hsa:3303%09red/hsa:4615%09red/hsa:929%09red	img/hsa05134.html
MAPK signaling pathway	KEGG PATHWAY	hsa04010	17	295	0.000295011	0.0348113	ERBB3|PDGFB|HSPA8|HSPA2|PTPRR|PDGFRB|MECOM|CACNB2|PRKCB|HSPA1A|HSPA1B|CD14|CACNA2D3|MYD88|MAPKAPK3|FGF1|FGFR1	http://www.genome.jp/kegg-bin/show_pathway?hsa04010/hsa:5579%09red/hsa:5155%09red/hsa:55799%09red/hsa:3312%09red/hsa:3306%09red/hsa:2246%09red/hsa:2122%09red/hsa:5159%09red/hsa:783%09red/hsa:3304%09red/hsa:7867%09red/hsa:2065%09red/hsa:2260%09red/hsa:4615%09red/hsa:3303%09red/hsa:5801%09red/hsa:929%09red	img/hsa04010.html
Toxoplasmosis	KEGG PATHWAY	hsa05145	9	113	0.000901532	0.0709205	LAMA1|LAMA5|HSPA2|BIRC7|HSPA8|HSPA1B|HSPA1A|TLR4|MYD88	http://www.genome.jp/kegg-bin/show_pathway?hsa05145/hsa:3304%09red/hsa:7099%09red/hsa:3306%09red/hsa:79444%09red/hsa:3312%09red/hsa:3303%09red/hsa:3911%09red/hsa:4615%09red/hsa:284217%09red	img/hsa05145.html
Focal adhesion	KEGG PATHWAY	hsa04510	12	199	0.00158667	0.0936134	PDGFRB|PDGFB|PRKCB|LAMA5|SHC3|THBS4|CCND2|COL9A2|LAMA1|RELN|VWF|MYL9	http://www.genome.jp/kegg-bin/show_pathway?hsa04510/hsa:7450%09red/hsa:5579%09red/hsa:894%09red/hsa:3911%09red/hsa:1298%09red/hsa:7060%09red/hsa:5159%09red/hsa:53358%09red/hsa:5649%09red/hsa:5155%09red/hsa:284217%09red/hsa:10398%09red	img/hsa04510.html
Measles	KEGG PATHWAY	hsa05162	8	138	0.0117978	0.477512	HSPA2|HSPA8|CCND2|HSPA1B|HSPA1A|TLR4|IKBKE|MYD88	http://www.genome.jp/kegg-bin/show_pathway?hsa05162/hsa:894%09red/hsa:3304%09red/hsa:7099%09red/hsa:3306%09red/hsa:3312%09red/hsa:3303%09red/hsa:4615%09red/hsa:9641%09red	img/hsa05162.html
ECM-receptor interaction	KEGG PATHWAY	hsa04512	6	86	0.0121401	0.477512	LAMA1|LAMA5|THBS4|COL9A2|RELN|VWF	http://www.genome.jp/kegg-bin/show_pathway?hsa04512/hsa:7450%09red/hsa:3911%09red/hsa:1298%09red/hsa:7060%09red/hsa:5649%09red/hsa:284217%09red	img/hsa04512.html
Protein digestion and absorption	KEGG PATHWAY	hsa04974	6	90	0.0149544	0.504178	COL15A1|COL7A1|COL9A2|COL5A1|MME|COL17A1	http://www.genome.jp/kegg-bin/show_pathway?hsa04974/hsa:1294%09red/hsa:4311%09red/hsa:1298%09red/hsa:1289%09red/hsa:1306%09red/hsa:1308%09red	img/hsa04974.html
Amoebiasis	KEGG PATHWAY	hsa05146	6	95	0.0190728	0.562649	LAMA1|LAMA5|PRKCB|CD14|TLR4|GNAL	http://www.genome.jp/kegg-bin/show_pathway?hsa05146/hsa:5579%09red/hsa:2774%09red/hsa:3911%09red/hsa:7099%09red/hsa:284217%09red/hsa:929%09red	img/hsa05146.html
Complement and coagulation cascades	KEGG PATHWAY	hsa04610	5	79	0.0311168	0.625947	VWF|MBL2|F5|FGB|SERPINF2	http://www.genome.jp/kegg-bin/show_pathway?hsa04610/hsa:7450%09red/hsa:5345%09red/hsa:2153%09red/hsa:2244%09red/hsa:4153%09red	img/hsa04610.html
EGFR tyrosine kinase inhibitor resistance	KEGG PATHWAY	hsa01521	5	79	0.0311168	0.625947	ERBB3|PDGFB|PRKCB|PDGFRB|SHC3	http://www.genome.jp/kegg-bin/show_pathway?hsa01521/hsa:5579%09red/hsa:5155%09red/hsa:2065%09red/hsa:5159%09red/hsa:53358%09red	img/hsa01521.html
Human papillomavirus infection	KEGG PATHWAY	hsa05165	13	330	0.0325944	0.625947	PDGFRB|LAMA5|LAMA1|FZD8|THBS4|CCND2|COL9A2|TCIRG1|RELN|IKBKE|VWF|TERT|WNT5A	http://www.genome.jp/kegg-bin/show_pathway?hsa05165/hsa:7450%09red/hsa:7474%09red/hsa:3911%09red/hsa:1298%09red/hsa:894%09red/hsa:5159%09red/hsa:7060%09red/hsa:5649%09red/hsa:8325%09red/hsa:284217%09red/hsa:10312%09red/hsa:7015%09red/hsa:9641%09red
Pathogenic Escherichia coli infection	KEGG PATHWAY	hsa05130	4	55	0.0336752	0.625947	HCLS1|CD14|TUBB3|TLR4	http://www.genome.jp/kegg-bin/show_pathway?hsa05130/hsa:3059%09red/hsa:929%09red/hsa:10381%09red/hsa:7099%09red	img/hsa05130.html
Peroxisome	KEGG PATHWAY	hsa04146	5	83	0.0373748	0.625947	PAOX|IDH2|MPV17L|PEX11G|PHYH	http://www.genome.jp/kegg-bin/show_pathway?hsa04146/hsa:3418%09red/hsa:5264%09red/hsa:255027%09red/hsa:196743%09red/hsa:92960%09red	img/hsa04146.html
Glycosaminoglycan biosynthesis - keratan sulfate	KEGG PATHWAY	hsa00533	2	14	0.0376834	0.625947	CHST2|CHST6	http://www.genome.jp/kegg-bin/show_pathway?hsa00533/hsa:9435%09red/hsa:4166%09red	img/hsa00533.html
Steroid hormone biosynthesis	KEGG PATHWAY	hsa00140	4	60	0.0442459	0.625947	CYP1A1|CYP11A1|AKR1C1|AKR1C3	http://www.genome.jp/kegg-bin/show_pathway?hsa00140/hsa:1645%09red/hsa:1583%09red/hsa:8644%09red/hsa:1543%09red	img/hsa00140.html
African trypanosomiasis	KEGG PATHWAY	hsa05143	3	37	0.0485997	0.625947	PRKCB|MYD88|APOL1	http://www.genome.jp/kegg-bin/show_pathway?hsa05143/hsa:5579%09red/hsa:8542%09red/hsa:4615%09red	img/hsa05143.html
Longevity regulating pathway - multiple species	KEGG PATHWAY	hsa04213	4	62	0.0489387	0.625947	HSPA1B|HSPA1A|HSPA8|HSPA2	http://www.genome.jp/kegg-bin/show_pathway?hsa04213/hsa:3304%09red/hsa:3306%09red/hsa:3312%09red/hsa:3303%09red	img/hsa04213.html
Axon guidance	KEGG PATHWAY	hsa04360	8	181	0.0490169	0.625947	EFNB3|EPHA7|PLXNA2|TRPC3|SLIT3|SEMA4A|WNT5A|MYL9	http://www.genome.jp/kegg-bin/show_pathway?hsa04360/hsa:7474%09red/hsa:5362%09red/hsa:7222%09red/hsa:6586%09red/hsa:2045%09red/hsa:64218%09red/hsa:1949%09red/hsa:10398%09red	img/hsa04360.html
PI3K-Akt signaling pathway	KEGG PATHWAY	hsa04151	13	354	0.0522385	0.625947	ERBB3|PDGFB|LAMA5|PDGFRB|THBS4|CCND2|COL9A2|LAMA1|RELN|TLR4|VWF|FGF1|FGFR1	http://www.genome.jp/kegg-bin/show_pathway?hsa04151/hsa:7450%09red/hsa:894%09red/hsa:3911%09red/hsa:2246%09red/hsa:1298%09red/hsa:7060%09red/hsa:5159%09red/hsa:5649%09red/hsa:2065%09red/hsa:2260%09red/hsa:5155%09red/hsa:7099%09red/hsa:284217%09red	img/hsa04151.html
Phagosome	KEGG PATHWAY	hsa04145	7	152	0.0530463	0.625947	OLR1|THBS4|TUBB3|TCIRG1|CD14|TLR4|MBL2	http://www.genome.jp/kegg-bin/show_pathway?hsa04145/hsa:4153%09red/hsa:7099%09red/hsa:7060%09red/hsa:4973%09red/hsa:10381%09red/hsa:929%09red/hsa:10312%09red	img/hsa04145.html
Retinol metabolism	KEGG PATHWAY	hsa00830	4	67	0.0618237	0.681466	CYP26B1|CYP1A1|CYP2B6|RDH12	http://www.genome.jp/kegg-bin/show_pathway?hsa00830/hsa:56603%09red/hsa:145226%09red/hsa:1555%09red/hsa:1543%09red	img/hsa00830.html
NF-kappa B signaling pathway	KEGG PATHWAY	hsa04064	5	100	0.0721067	0.681466	CD14|MYD88|TLR4|PRKCB|TNFSF14	http://www.genome.jp/kegg-bin/show_pathway?hsa04064/hsa:5579%09red/hsa:8740%09red/hsa:929%09red/hsa:4615%09red/hsa:7099%09red	img/hsa04064.html
Melanoma	KEGG PATHWAY	hsa05218	4	72	0.0763234	0.681466	PDGFRB|PDGFB|FGF1|FGFR1	http://www.genome.jp/kegg-bin/show_pathway?hsa05218/hsa:2246%09red/hsa:5155%09red/hsa:2260%09red/hsa:5159%09red	img/hsa05218.html
Bacterial invasion of epithelial cells	KEGG PATHWAY	hsa05100	4	74	0.0825624	0.681466	SEPTIN8|HCLS1|ELMO3|SHC3	http://www.genome.jp/kegg-bin/show_pathway?hsa05100/hsa:79767%09red/hsa:3059%09red/hsa:23176%09red/hsa:53358%09red	img/hsa05100.html
Proteoglycans in cancer	KEGG PATHWAY	hsa05205	8	203	0.0834729	0.681466	ERBB3|HSPB2|FZD8|PRKCB|TLR4|HCLS1|WNT5A|FGFR1	http://www.genome.jp/kegg-bin/show_pathway?hsa05205/hsa:5579%09red/hsa:7474%09red/hsa:3316%09red/hsa:3059%09red/hsa:2065%09red/hsa:2260%09red/hsa:7099%09red/hsa:8325%09red	img/hsa05205.html
Glioma	KEGG PATHWAY	hsa05214	4	75	0.0857736	0.681466	PDGFRB|PDGFB|PRKCB|SHC3	http://www.genome.jp/kegg-bin/show_pathway?hsa05214/hsa:5579%09red/hsa:5155%09red/hsa:5159%09red/hsa:53358%09red	img/hsa05214.html
Estrogen signaling pathway	KEGG PATHWAY	hsa04915	6	138	0.0875386	0.681466	HSPA2|SHC3|HSPA8|HSPA1B|HSPA1A|GABBR2	http://www.genome.jp/kegg-bin/show_pathway?hsa04915/hsa:9568%09red/hsa:3304%09red/hsa:3306%09red/hsa:3312%09red/hsa:3303%09red/hsa:53358%09red	img/hsa04915.html
Pertussis	KEGG PATHWAY	hsa05133	4	76	0.0890451	0.681466	CD14|MYD88|TLR4|CASP1	http://www.genome.jp/kegg-bin/show_pathway?hsa05133/hsa:834%09red/hsa:7099%09red/hsa:929%09red/hsa:4615%09red	img/hsa05133.html
Metabolism of xenobiotics by cytochrome P450	KEGG PATHWAY	hsa00980	4	76	0.0890451	0.681466	CYP1A1|CYP2B6|AKR1C1|ALDH1A3	http://www.genome.jp/kegg-bin/show_pathway?hsa00980/hsa:1645%09red/hsa:1555%09red/hsa:220%09red/hsa:1543%09red	img/hsa00980.html
Antigen processing and presentation	KEGG PATHWAY	hsa04612	4	77	0.0923762	0.681466	HSPA1B|HSPA1A|HSPA8|HSPA2	http://www.genome.jp/kegg-bin/show_pathway?hsa04612/hsa:3304%09red/hsa:3306%09red/hsa:3312%09red/hsa:3303%09red	img/hsa04612.html
Arrhythmogenic right ventricular cardiomyopathy (ARVC)	KEGG PATHWAY	hsa05412	4	77	0.0923762	0.681466	CACNA2D3|DSP|LAMA1|CACNB2	http://www.genome.jp/kegg-bin/show_pathway?hsa05412/hsa:55799%09red/hsa:284217%09red/hsa:783%09red/hsa:1832%09red	img/hsa05412.html
Malaria	KEGG PATHWAY	hsa05144	3	49	0.0952898	0.681466	THBS4|MYD88|TLR4	http://www.genome.jp/kegg-bin/show_pathway?hsa05144/hsa:7099%09red/hsa:7060%09red/hsa:4615%09red	img/hsa05144.html
Ovarian steroidogenesis	KEGG PATHWAY	hsa04913	3	49	0.0952898	0.681466	CYP1A1|CYP11A1|AKR1C3	http://www.genome.jp/kegg-bin/show_pathway?hsa04913/hsa:1583%09red/hsa:8644%09red/hsa:1543%09red	img/hsa04913.html
Cholesterol metabolism	KEGG PATHWAY	hsa04979	3	50	0.0997921	0.692675	LIPC|APOE|APOC1	http://www.genome.jp/kegg-bin/show_pathway?hsa04979/hsa:3990%09red/hsa:348%09red/hsa:341%09red
Cell adhesion molecules (CAMs)	KEGG PATHWAY	hsa04514	6	146	0.107289	0.723431	CLDN23|CD22|CDH4|PDCD1LG2|CDH3|CLDN2	http://www.genome.jp/kegg-bin/show_pathway?hsa04514/hsa:9075%09red/hsa:80380%09red/hsa:933%09red/hsa:137075%09red/hsa:1001%09red/hsa:1002%09red	img/hsa04514.html
Salmonella infection	KEGG PATHWAY	hsa05132	4	83	0.11357	0.735074	CD14|MYD88|TLR4|CASP1	http://www.genome.jp/kegg-bin/show_pathway?hsa05132/hsa:834%09red/hsa:7099%09red/hsa:929%09red/hsa:4615%09red	img/hsa05132.html
Gastric cancer	KEGG PATHWAY	hsa05226	6	149	0.115245	0.735074	CDH17|SHC3|FZD8|WNT5A|TERT|FGF1	http://www.genome.jp/kegg-bin/show_pathway?hsa05226/hsa:7474%09red/hsa:2246%09red/hsa:53358%09red/hsa:7015%09red/hsa:8325%09red/hsa:1015%09red
ErbB signaling pathway	KEGG PATHWAY	hsa04012	4	85	0.121075	0.751941	ERBB3|NRG3|PRKCB|SHC3	http://www.genome.jp/kegg-bin/show_pathway?hsa04012/hsa:5579%09red/hsa:10718%09red/hsa:2065%09red/hsa:53358%09red	img/hsa04012.html
Gap junction	KEGG PATHWAY	hsa04540	4	88	0.13272	0.803129	PDGFRB|PDGFB|PRKCB|TUBB3	http://www.genome.jp/kegg-bin/show_pathway?hsa04540/hsa:5579%09red/hsa:5155%09red/hsa:10381%09red/hsa:5159%09red	img/hsa04540.html
Wnt signaling pathway	KEGG PATHWAY	hsa04310	6	160	0.146846	0.860266	SFRP2|PRKCB|FZD8|DAAM2|CCND2|WNT5A	http://www.genome.jp/kegg-bin/show_pathway?hsa04310/hsa:5579%09red/hsa:7474%09red/hsa:23500%09red/hsa:894%09red/hsa:6423%09red/hsa:8325%09red	img/hsa04310.html
Mucin type O-glycan biosynthesis	KEGG PATHWAY	hsa00512	2	31	0.151126	0.860266	GALNT16|GALNT3	http://www.genome.jp/kegg-bin/show_pathway?hsa00512/hsa:57452%09red/hsa:2591%09red	img/hsa00512.html
Small cell lung cancer	KEGG PATHWAY	hsa05222	4	93	0.153098	0.860266	BIRC7|LAMA1|SKP2|LAMA5	http://www.genome.jp/kegg-bin/show_pathway?hsa05222/hsa:284217%09red/hsa:3911%09red/hsa:79444%09red/hsa:6502%09red	img/hsa05222.html
Sulfur relay system	KEGG PATHWAY	hsa04122	1	8	0.165022	0.875135	TST	http://www.genome.jp/kegg-bin/show_pathway?hsa04122/hsa:7263%09red	img/hsa04122.html
Arachidonic acid metabolism	KEGG PATHWAY	hsa00590	3	63	0.165151	0.875135	PTGDS|CYP2B6|AKR1C3	http://www.genome.jp/kegg-bin/show_pathway?hsa00590/hsa:1555%09red/hsa:5730%09red/hsa:8644%09red	img/hsa00590.html
beta-Alanine metabolism	KEGG PATHWAY	hsa00410	2	33	0.166869	0.875135	DPYS|ALDH1A3	http://www.genome.jp/kegg-bin/show_pathway?hsa00410/hsa:1807%09red/hsa:220%09red	img/hsa00410.html
Hepatocellular carcinoma	KEGG PATHWAY	hsa05225	6	168	0.172053	0.882706	DPF3|SHC3|FZD8|PRKCB|WNT5A|TERT	http://www.genome.jp/kegg-bin/show_pathway?hsa05225/hsa:5579%09red/hsa:8110%09red/hsa:7474%09red/hsa:53358%09red/hsa:7015%09red/hsa:8325%09red
Choline metabolism in cancer	KEGG PATHWAY	hsa05231	4	99	0.178992	0.89877	PDGFRB|PDGFB|PRKCB|SLC22A3	http://www.genome.jp/kegg-bin/show_pathway?hsa05231/hsa:5579%09red/hsa:5155%09red/hsa:6581%09red/hsa:5159%09red	img/hsa05231.html
Prion diseases	KEGG PATHWAY	hsa05020	2	35	0.182879	0.899155	HSPA1A|EGR1	http://www.genome.jp/kegg-bin/show_pathway?hsa05020/hsa:1958%09red/hsa:3303%09red	img/hsa05020.html
Toll-like receptor signaling pathway	KEGG PATHWAY	hsa04620	4	104	0.201614	0.934356	CD14|MYD88|TLR4|IKBKE	http://www.genome.jp/kegg-bin/show_pathway?hsa04620/hsa:7099%09red/hsa:929%09red/hsa:9641%09red/hsa:4615%09red	img/hsa04620.html
Sulfur metabolism	KEGG PATHWAY	hsa00920	1	10	0.201857	0.934356	TST	http://www.genome.jp/kegg-bin/show_pathway?hsa00920/hsa:7263%09red	img/hsa00920.html
Prolactin signaling pathway	KEGG PATHWAY	hsa04917	3	70	0.20446	0.934356	CCND2|CISH|SHC3	http://www.genome.jp/kegg-bin/show_pathway?hsa04917/hsa:894%09red/hsa:1154%09red/hsa:53358%09red	img/hsa04917.html
NOD-like receptor signaling pathway	KEGG PATHWAY	hsa04621	6	178	0.205875	0.934356	CASP4|CASP1|CARD16|TLR4|IKBKE|MYD88	http://www.genome.jp/kegg-bin/show_pathway?hsa04621/hsa:834%09red/hsa:837%09red/hsa:7099%09red/hsa:4615%09red/hsa:114769%09red/hsa:9641%09red	img/hsa04621.html
Parathyroid hormone synthesis, secretion and action	KEGG PATHWAY	hsa04928	4	106	0.210895	0.93908	EGR1|MMP17|PRKCB|FGFR1	http://www.genome.jp/kegg-bin/show_pathway?hsa04928/hsa:5579%09red/hsa:4326%09red/hsa:1958%09red/hsa:2260%09red
Leishmaniasis	KEGG PATHWAY	hsa05140	3	74	0.227815	0.944308	MYD88|TLR4|PRKCB	http://www.genome.jp/kegg-bin/show_pathway?hsa05140/hsa:5579%09red/hsa:7099%09red/hsa:4615%09red	img/hsa05140.html
Breast cancer	KEGG PATHWAY	hsa05224	5	147	0.230142	0.944308	FZD8|WNT5A|SHC3|FGF1|FGFR1	http://www.genome.jp/kegg-bin/show_pathway?hsa05224/hsa:2246%09red/hsa:7474%09red/hsa:2260%09red/hsa:8325%09red/hsa:53358%09red	img/hsa05224.html
Leukocyte transendothelial migration	KEGG PATHWAY	hsa04670	4	112	0.239419	0.944308	CLDN23|CLDN2|PRKCB|MYL9	http://www.genome.jp/kegg-bin/show_pathway?hsa04670/hsa:5579%09red/hsa:137075%09red/hsa:9075%09red/hsa:10398%09red	img/hsa04670.html
Synaptic vesicle cycle	KEGG PATHWAY	hsa04721	3	78	0.251646	0.944308	TCIRG1|STX1B|UNC13A	http://www.genome.jp/kegg-bin/show_pathway?hsa04721/hsa:112755%09red/hsa:23025%09red/hsa:10312%09red	img/hsa04721.html
Carbohydrate digestion and absorption	KEGG PATHWAY	hsa04973	2	44	0.256886	0.944308	SLC2A5|PRKCB	http://www.genome.jp/kegg-bin/show_pathway?hsa04973/hsa:5579%09red/hsa:6518%09red	img/hsa04973.html
Hippo signaling pathway	KEGG PATHWAY	hsa04390	5	154	0.259337	0.944308	FZD8|WNT5A|CCND2|GDF6|FGF1	http://www.genome.jp/kegg-bin/show_pathway?hsa04390/hsa:392255%09red/hsa:7474%09red/hsa:2246%09red/hsa:894%09red/hsa:8325%09red	img/hsa04390.html
Sphingolipid metabolism	KEGG PATHWAY	hsa00600	2	47	0.281821	0.944308	GAL3ST1|SPTLC3	http://www.genome.jp/kegg-bin/show_pathway?hsa00600/hsa:55304%09red/hsa:9514%09red	img/hsa00600.html
Yersinia infection	KEGG PATHWAY	hsa05135	4	121	0.283704	0.944308	CASP1|MYD88|TLR4|ACTR3B	http://www.genome.jp/kegg-bin/show_pathway?hsa05135/hsa:834%09red/hsa:7099%09red/hsa:57180%09red/hsa:4615%09red
Notch signaling pathway	KEGG PATHWAY	hsa04330	2	48	0.290123	0.944308	DTX4|DTX1	http://www.genome.jp/kegg-bin/show_pathway?hsa04330/hsa:1840%09red/hsa:23220%09red	img/hsa04330.html
Amino sugar and nucleotide sugar metabolism	KEGG PATHWAY	hsa00520	2	48	0.290123	0.944308	RENBP|GFPT2	http://www.genome.jp/kegg-bin/show_pathway?hsa00520/hsa:9945%09red/hsa:5973%09red	img/hsa00520.html
Pathways in cancer	KEGG PATHWAY	hsa05200	14	530	0.292546	0.944308	PDGFRB|PDGFB|PRKCB|SKP2|LAMA5|LAMA1|MECOM|CCND2|FZD8|BIRC7|WNT5A|TERT|FGF1|FGFR1	http://www.genome.jp/kegg-bin/show_pathway?hsa05200/hsa:5579%09red/hsa:7474%09red/hsa:894%09red/hsa:3911%09red/hsa:79444%09red/hsa:2246%09red/hsa:2122%09red/hsa:5159%09red/hsa:6502%09red/hsa:2260%09red/hsa:5155%09red/hsa:284217%09red/hsa:7015%09red/hsa:8325%09red	img/hsa05200.html
Jak-STAT signaling pathway	KEGG PATHWAY	hsa04630	5	162	0.293705	0.944308	PDGFRB|IL21R|CCND2|PDGFB|CISH	http://www.genome.jp/kegg-bin/show_pathway?hsa04630/hsa:894%09red/hsa:5155%09red/hsa:50615%09red/hsa:5159%09red/hsa:1154%09red	img/hsa04630.html
Thiamine metabolism	KEGG PATHWAY	hsa00730	1	16	0.302942	0.944308	AK8	http://www.genome.jp/kegg-bin/show_pathway?hsa00730/hsa:158067%09red	img/hsa00730.html
N-Glycan biosynthesis	KEGG PATHWAY	hsa00510	2	50	0.30669	0.944308	MGAT3|MGAT4C	http://www.genome.jp/kegg-bin/show_pathway?hsa00510/hsa:4248%09red/hsa:25834%09red	img/hsa00510.html
Influenza A	KEGG PATHWAY	hsa05164	5	167	0.315581	0.944308	CASP1|MYD88|TLR4|PRKCB|IKBKE	http://www.genome.jp/kegg-bin/show_pathway?hsa05164/hsa:5579%09red/hsa:834%09red/hsa:9641%09red/hsa:4615%09red/hsa:7099%09red	img/hsa05164.html
Phenylalanine metabolism	KEGG PATHWAY	hsa00360	1	17	0.318505	0.944308	ALDH1A3	http://www.genome.jp/kegg-bin/show_pathway?hsa00360/hsa:220%09red	img/hsa00360.html
GABAergic synapse	KEGG PATHWAY	hsa04727	3	89	0.318612	0.944308	GABBR2|PRKCB|GABRB3	http://www.genome.jp/kegg-bin/show_pathway?hsa04727/hsa:5579%09red/hsa:9568%09red/hsa:2562%09red	img/hsa04727.html
Hypertrophic cardiomyopathy (HCM)	KEGG PATHWAY	hsa05410	3	90	0.324746	0.944308	CACNA2D3|LAMA1|CACNB2	http://www.genome.jp/kegg-bin/show_pathway?hsa05410/hsa:55799%09red/hsa:284217%09red/hsa:783%09red	img/hsa05410.html
Rap1 signaling pathway	KEGG PATHWAY	hsa04015	6	210	0.326468	0.944308	PDGFRB|PDGFB|FPR1|PRKCB|FGF1|FGFR1	http://www.genome.jp/kegg-bin/show_pathway?hsa04015/hsa:5579%09red/hsa:5155%09red/hsa:2246%09red/hsa:5159%09red/hsa:2260%09red/hsa:2357%09red	img/hsa04015.html
Tight junction	KEGG PATHWAY	hsa04530	5	170	0.328812	0.944308	HCLS1|CLDN23|CLDN2|ACTR3B|MYL9	http://www.genome.jp/kegg-bin/show_pathway?hsa04530/hsa:3059%09red/hsa:57180%09red/hsa:9075%09red/hsa:10398%09red/hsa:137075%09red	img/hsa04530.html
Morphine addiction	KEGG PATHWAY	hsa05032	3	91	0.330881	0.944308	GABBR2|PRKCB|GABRB3	http://www.genome.jp/kegg-bin/show_pathway?hsa05032/hsa:5579%09red/hsa:9568%09red/hsa:2562%09red	img/hsa05032.html
2-Oxocarboxylic acid metabolism	KEGG PATHWAY	hsa01210	1	18	0.333723	0.944308	IDH2	http://www.genome.jp/kegg-bin/show_pathway?hsa01210/hsa:3418%09red	img/hsa01210.html
Regulation of actin cytoskeleton	KEGG PATHWAY	hsa04810	6	214	0.342353	0.944308	PDGFRB|PDGFB|CHRM5|MYL9|FGF1|FGFR1	http://www.genome.jp/kegg-bin/show_pathway?hsa04810/hsa:5155%09red/hsa:2246%09red/hsa:5159%09red/hsa:2260%09red/hsa:10398%09red/hsa:1133%09red	img/hsa04810.html
Pantothenate and CoA biosynthesis	KEGG PATHWAY	hsa00770	1	19	0.348603	0.944308	DPYS	http://www.genome.jp/kegg-bin/show_pathway?hsa00770/hsa:1807%09red	img/hsa00770.html
TGF-beta signaling pathway	KEGG PATHWAY	hsa04350	3	94	0.349271	0.944308	CHRD|GDF6|LTBP1	http://www.genome.jp/kegg-bin/show_pathway?hsa04350/hsa:392255%09red/hsa:8646%09red/hsa:4052%09red	img/hsa04350.html
MicroRNAs in cancer	KEGG PATHWAY	hsa05206	8	299	0.34945	0.944308	ERBB3|PDGFB|PRKCB|BMF|TRIM71|PDGFRB|CCND2|TP63	http://www.genome.jp/kegg-bin/show_pathway?hsa05206/hsa:5579%09red/hsa:894%09red/hsa:131405%09red/hsa:90427%09red/hsa:5155%09red/hsa:5159%09red/hsa:2065%09red/hsa:8626%09red	img/hsa05206.html
Spliceosome	KEGG PATHWAY	hsa03040	4	135	0.354543	0.944308	HSPA1B|HSPA1A|HSPA8|HSPA2	http://www.genome.jp/kegg-bin/show_pathway?hsa03040/hsa:3304%09red/hsa:3306%09red/hsa:3312%09red/hsa:3303%09red	img/hsa03040.html
Dilated cardiomyopathy (DCM)	KEGG PATHWAY	hsa05414	3	96	0.361505	0.944308	CACNA2D3|LAMA1|CACNB2	http://www.genome.jp/kegg-bin/show_pathway?hsa05414/hsa:55799%09red/hsa:284217%09red/hsa:783%09red	img/hsa05414.html
Glycosaminoglycan biosynthesis - chondroitin sulfate / dermatan sulfate	KEGG PATHWAY	hsa00532	1	20	0.363152	0.944308	CHSY3	http://www.genome.jp/kegg-bin/show_pathway?hsa00532/hsa:337876%09red	img/hsa00532.html
Hematopoietic cell lineage	KEGG PATHWAY	hsa04640	3	97	0.367611	0.944308	MME|CD22|CD14	http://www.genome.jp/kegg-bin/show_pathway?hsa04640/hsa:929%09red/hsa:933%09red/hsa:4311%09red	img/hsa04640.html
Prostate cancer	KEGG PATHWAY	hsa05215	3	97	0.367611	0.944308	PDGFRB|PDGFB|FGFR1	http://www.genome.jp/kegg-bin/show_pathway?hsa05215/hsa:5155%09red/hsa:2260%09red/hsa:5159%09red	img/hsa05215.html
Tuberculosis	KEGG PATHWAY	hsa05152	5	179	0.36878	0.944308	TCIRG1|CD14|MYD88|CLEC4E|TLR4	http://www.genome.jp/kegg-bin/show_pathway?hsa05152/hsa:26253%09red/hsa:929%09red/hsa:10312%09red/hsa:4615%09red/hsa:7099%09red	img/hsa05152.html
VEGF signaling pathway	KEGG PATHWAY	hsa04370	2	59	0.379987	0.944308	PRKCB|MAPKAPK3	http://www.genome.jp/kegg-bin/show_pathway?hsa04370/hsa:5579%09red/hsa:7867%09red	img/hsa04370.html
Other types of O-glycan biosynthesis	KEGG PATHWAY	hsa00514	1	22	0.391289	0.944308	GXYLT2	http://www.genome.jp/kegg-bin/show_pathway?hsa00514/hsa:727936%09red	img/hsa00514.html
Melanogenesis	KEGG PATHWAY	hsa04916	3	101	0.391923	0.944308	FZD8|WNT5A|PRKCB	http://www.genome.jp/kegg-bin/show_pathway?hsa04916/hsa:5579%09red/hsa:7474%09red/hsa:8325%09red	img/hsa04916.html
Chagas disease (American trypanosomiasis)	KEGG PATHWAY	hsa05142	3	103	0.403996	0.944308	GNAL|MYD88|TLR4	http://www.genome.jp/kegg-bin/show_pathway?hsa05142/hsa:7099%09red/hsa:2774%09red/hsa:4615%09red	img/hsa05142.html
Mannose type O-glycan biosynthesis	KEGG PATHWAY	hsa00515	1	23	0.40489	0.944308	LARGE1	http://www.genome.jp/kegg-bin/show_pathway?hsa00515/hsa:9215%09red	img/hsa00515.html
Renin-angiotensin system	KEGG PATHWAY	hsa04614	1	23	0.40489	0.944308	MME	http://www.genome.jp/kegg-bin/show_pathway?hsa04614/hsa:4311%09red	img/hsa04614.html
Histidine metabolism	KEGG PATHWAY	hsa00340	1	23	0.40489	0.944308	ALDH1A3	http://www.genome.jp/kegg-bin/show_pathway?hsa00340/hsa:220%09red	img/hsa00340.html
C-type lectin receptor signaling pathway	KEGG PATHWAY	hsa04625	3	104	0.410007	0.944308	CLEC4E|CASP1|IKBKE	http://www.genome.jp/kegg-bin/show_pathway?hsa04625/hsa:834%09red/hsa:26253%09red/hsa:9641%09red
Basal cell carcinoma	KEGG PATHWAY	hsa05217	2	63	0.411561	0.944308	FZD8|WNT5A	http://www.genome.jp/kegg-bin/show_pathway?hsa05217/hsa:7474%09red/hsa:8325%09red	img/hsa05217.html
Cytosolic DNA-sensing pathway	KEGG PATHWAY	hsa04623	2	63	0.411561	0.944308	CASP1|IKBKE	http://www.genome.jp/kegg-bin/show_pathway?hsa04623/hsa:834%09red/hsa:9641%09red	img/hsa04623.html
Ras signaling pathway	KEGG PATHWAY	hsa04014	6	232	0.414435	0.944308	PDGFRB|PDGFB|SHC3|PRKCB|FGF1|FGFR1	http://www.genome.jp/kegg-bin/show_pathway?hsa04014/hsa:5579%09red/hsa:5155%09red/hsa:2246%09red/hsa:5159%09red/hsa:53358%09red/hsa:2260%09red	img/hsa04014.html
Vitamin digestion and absorption	KEGG PATHWAY	hsa04977	1	24	0.418189	0.944308	SLC19A3	http://www.genome.jp/kegg-bin/show_pathway?hsa04977/hsa:80704%09red	img/hsa04977.html
Inflammatory bowel disease (IBD)	KEGG PATHWAY	hsa05321	2	65	0.427053	0.944308	IL21R|TLR4	http://www.genome.jp/kegg-bin/show_pathway?hsa05321/hsa:7099%09red/hsa:50615%09red	img/hsa05321.html
Calcium signaling pathway	KEGG PATHWAY	hsa04020	5	193	0.430952	0.944308	GNAL|ERBB3|CHRM5|PRKCB|PDGFRB	http://www.genome.jp/kegg-bin/show_pathway?hsa04020/hsa:5579%09red/hsa:1133%09red/hsa:2065%09red/hsa:5159%09red/hsa:2774%09red	img/hsa04020.html
Insulin resistance	KEGG PATHWAY	hsa04931	3	108	0.43386	0.944308	GFPT2|PRKCB|SLC27A3	http://www.genome.jp/kegg-bin/show_pathway?hsa04931/hsa:5579%09red/hsa:9945%09red/hsa:11000%09red	img/hsa04931.html
HIF-1 signaling pathway	KEGG PATHWAY	hsa04066	3	109	0.43977	0.944308	ALDOC|PRKCB|TLR4	http://www.genome.jp/kegg-bin/show_pathway?hsa04066/hsa:5579%09red/hsa:7099%09red/hsa:230%09red	img/hsa04066.html
Long-term potentiation	KEGG PATHWAY	hsa04720	2	67	0.442331	0.944308	PPP1R1A|PRKCB	http://www.genome.jp/kegg-bin/show_pathway?hsa04720/hsa:5579%09red/hsa:5502%09red	img/hsa04720.html
Folate biosynthesis	KEGG PATHWAY	hsa00790	1	26	0.443907	0.944308	AKR1C3	http://www.genome.jp/kegg-bin/show_pathway?hsa00790/hsa:8644%09red	img/hsa00790.html
mTOR signaling pathway	KEGG PATHWAY	hsa04150	4	153	0.445472	0.944308	FZD8|WNT5A|PRKCB|SKP2	http://www.genome.jp/kegg-bin/show_pathway?hsa04150/hsa:5579%09red/hsa:7474%09red/hsa:8325%09red/hsa:6502%09red	img/hsa04150.html
Oxytocin signaling pathway	KEGG PATHWAY	hsa04921	4	153	0.445472	0.944308	CACNA2D3|PRKCB|CACNB2|MYL9	http://www.genome.jp/kegg-bin/show_pathway?hsa04921/hsa:55799%09red/hsa:5579%09red/hsa:783%09red/hsa:10398%09red	img/hsa04921.html
Shigellosis	KEGG PATHWAY	hsa05131	2	68	0.449887	0.944308	HCLS1|ELMO3	http://www.genome.jp/kegg-bin/show_pathway?hsa05131/hsa:79767%09red/hsa:3059%09red	img/hsa05131.html
Staphylococcus aureus infection	KEGG PATHWAY	hsa05150	2	68	0.449887	0.944308	FPR1|MBL2	http://www.genome.jp/kegg-bin/show_pathway?hsa05150/hsa:4153%09red/hsa:2357%09red	img/hsa05150.html
Glycolysis / Gluconeogenesis	KEGG PATHWAY	hsa00010	2	68	0.449887	0.944308	ALDOC|ALDH1A3	http://www.genome.jp/kegg-bin/show_pathway?hsa00010/hsa:230%09red/hsa:220%09red	img/hsa00010.html
Glycosphingolipid biosynthesis - lacto and neolacto series	KEGG PATHWAY	hsa00601	1	27	0.456339	0.944308	B3GNT3	http://www.genome.jp/kegg-bin/show_pathway?hsa00601/hsa:10331%09red	img/hsa00601.html
Collecting duct acid secretion	KEGG PATHWAY	hsa04966	1	27	0.456339	0.944308	TCIRG1	http://www.genome.jp/kegg-bin/show_pathway?hsa04966/hsa:10312%09red	img/hsa04966.html
Central carbon metabolism in cancer	KEGG PATHWAY	hsa05230	2	69	0.457385	0.944308	PDGFRB|FGFR1	http://www.genome.jp/kegg-bin/show_pathway?hsa05230/hsa:2260%09red/hsa:5159%09red	img/hsa05230.html
Epstein-Barr virus infection	KEGG PATHWAY	hsa05169	5	201	0.465992	0.944308	RUNX3|CCND2|SKP2|MYD88|IKBKE	http://www.genome.jp/kegg-bin/show_pathway?hsa05169/hsa:894%09red/hsa:6502%09red/hsa:9641%09red/hsa:4615%09red/hsa:864%09red	img/hsa05169.html
Butanoate metabolism	KEGG PATHWAY	hsa00650	1	28	0.468494	0.944308	ACSM5	http://www.genome.jp/kegg-bin/show_pathway?hsa00650/hsa:54988%09red	img/hsa00650.html
Adherens junction	KEGG PATHWAY	hsa04520	2	72	0.479521	0.944308	PTPRB|FGFR1	http://www.genome.jp/kegg-bin/show_pathway?hsa04520/hsa:5787%09red/hsa:2260%09red	img/hsa04520.html
Drug metabolism - cytochrome P450	KEGG PATHWAY	hsa00982	2	72	0.479521	0.944308	CYP2B6|ALDH1A3	http://www.genome.jp/kegg-bin/show_pathway?hsa00982/hsa:1555%09red/hsa:220%09red	img/hsa00982.html
Neuroactive ligand-receptor interaction	KEGG PATHWAY	hsa04080	8	338	0.482451	0.944308	GRID1|FPR1|CHRM5|NPFFR2|NPFFR1|GABBR2|GABRB3|NPW	http://www.genome.jp/kegg-bin/show_pathway?hsa04080/hsa:283869%09red/hsa:9568%09red/hsa:2562%09red/hsa:2894%09red/hsa:64106%09red/hsa:10886%09red/hsa:1133%09red/hsa:2357%09red	img/hsa04080.html
Nicotinate and nicotinamide metabolism	KEGG PATHWAY	hsa00760	1	30	0.492	0.944308	NMNAT2	http://www.genome.jp/kegg-bin/show_pathway?hsa00760/hsa:23057%09red	img/hsa00760.html
Citrate cycle (TCA cycle)	KEGG PATHWAY	hsa00020	1	30	0.492	0.944308	IDH2	http://www.genome.jp/kegg-bin/show_pathway?hsa00020/hsa:3418%09red	img/hsa00020.html
Glyoxylate and dicarboxylate metabolism	KEGG PATHWAY	hsa00630	1	30	0.492	0.944308	HOGA1	http://www.genome.jp/kegg-bin/show_pathway?hsa00630/hsa:112817%09red	img/hsa00630.html
Pentose phosphate pathway	KEGG PATHWAY	hsa00030	1	30	0.492	0.944308	ALDOC	http://www.genome.jp/kegg-bin/show_pathway?hsa00030/hsa:230%09red	img/hsa00030.html
Thyroid hormone synthesis	KEGG PATHWAY	hsa04918	2	74	0.49397	0.944308	ASGR1|PRKCB	http://www.genome.jp/kegg-bin/show_pathway?hsa04918/hsa:5579%09red/hsa:432%09red	img/hsa04918.html
Hepatitis B	KEGG PATHWAY	hsa05161	4	163	0.494416	0.944308	MYD88|TLR4|PRKCB|IKBKE	http://www.genome.jp/kegg-bin/show_pathway?hsa05161/hsa:5579%09red/hsa:7099%09red/hsa:9641%09red/hsa:4615%09red	img/hsa05161.html
Gastric acid secretion	KEGG PATHWAY	hsa04971	2	75	0.5011	0.944308	PRKCB|KCNJ15	http://www.genome.jp/kegg-bin/show_pathway?hsa04971/hsa:5579%09red/hsa:3772%09red	img/hsa04971.html
Biosynthesis of amino acids	KEGG PATHWAY	hsa01230	2	75	0.5011	0.944308	IDH2|ALDOC	http://www.genome.jp/kegg-bin/show_pathway?hsa01230/hsa:3418%09red/hsa:230%09red	img/hsa01230.html
Protein processing in endoplasmic reticulum	KEGG PATHWAY	hsa04141	4	165	0.503996	0.944308	HSPA1B|HSPA1A|HSPA8|HSPA2	http://www.genome.jp/kegg-bin/show_pathway?hsa04141/hsa:3304%09red/hsa:3306%09red/hsa:3312%09red/hsa:3303%09red	img/hsa04141.html
PPAR signaling pathway	KEGG PATHWAY	hsa03320	2	76	0.508166	0.944308	PLIN4|OLR1	http://www.genome.jp/kegg-bin/show_pathway?hsa03320/hsa:4973%09red/hsa:729359%09red	img/hsa03320.html
Chronic myeloid leukemia	KEGG PATHWAY	hsa05220	2	76	0.508166	0.944308	MECOM|SHC3	http://www.genome.jp/kegg-bin/show_pathway?hsa05220/hsa:2122%09red/hsa:53358%09red	img/hsa05220.html
Autophagy - other	KEGG PATHWAY	hsa04136	1	32	0.514472	0.946405	ATG9B	http://www.genome.jp/kegg-bin/show_pathway?hsa04136/hsa:285973%09red	img/hsa04136.html
Metabolic pathways	KEGG PATHWAY	hsa01100	32	1432	0.524154	0.946405	AKR1C3|ACSM5|CHSY3|GAL3ST1|PTGDS|TST|ALDH1A3|DPYS|CYP11A1|B3GNT3|CYP2B6|CYP26B1|SPTLC3|NMNAT2|GYG2|RENBP|LIPC|RDH12|CYP1A1|LARGE1|IDH2|IMPA2|MGAT3|ALDOC|GALNT3|GALNT16|HOGA1|CMBL|AK8|TCIRG1|MGAT4C|GFPT2	http://www.genome.jp/kegg-bin/show_pathway?hsa01100/hsa:9215%09red/hsa:230%09red/hsa:57452%09red/hsa:145226%09red/hsa:337876%09red/hsa:1543%09red/hsa:3990%09red/hsa:7263%09red/hsa:4248%09red/hsa:8908%09red/hsa:3418%09red/hsa:1583%09red/hsa:54988%09red/hsa:112817%09red/hsa:134147%09red/hsa:8644%09red/hsa:220%09red/hsa:3613%09red/hsa:158067%09red/hsa:23057%09red/hsa:56603%09red/hsa:5973%09red/hsa:1…	img/hsa01100.html
Fructose and mannose metabolism	KEGG PATHWAY	hsa00051	1	33	0.525335	0.946405	ALDOC	http://www.genome.jp/kegg-bin/show_pathway?hsa00051/hsa:230%09red	img/hsa00051.html
Apoptosis - multiple species	KEGG PATHWAY	hsa04215	1	33	0.525335	0.946405	BIRC7	http://www.genome.jp/kegg-bin/show_pathway?hsa04215/hsa:79444%09red	img/hsa04215.html
SNARE interactions in vesicular transport	KEGG PATHWAY	hsa04130	1	34	0.535956	0.951091	STX1B	http://www.genome.jp/kegg-bin/show_pathway?hsa04130/hsa:112755%09red	img/hsa04130.html
Herpes simplex virus 1 infection	KEGG PATHWAY	hsa05168	11	492	0.540637	0.951091	ZNF677|ZNF433|ZNF182|ZNF454|ZIK1|ZFP69|IKBKE|TNFSF14|MYD88|ZNF563|ZNF665	http://www.genome.jp/kegg-bin/show_pathway?hsa05168/hsa:79788%09red/hsa:342926%09red/hsa:284307%09red/hsa:163059%09red/hsa:147837%09red/hsa:339559%09red/hsa:285676%09red/hsa:7569%09red/hsa:4615%09red/hsa:8740%09red/hsa:9641%09red	img/hsa05168.html
B cell receptor signaling pathway	KEGG PATHWAY	hsa04662	2	82	0.549173	0.951091	CD22|PRKCB	http://www.genome.jp/kegg-bin/show_pathway?hsa04662/hsa:5579%09red/hsa:933%09red	img/hsa04662.html
Chemical carcinogenesis	KEGG PATHWAY	hsa05204	2	82	0.549173	0.951091	CYP1A1|ALDH1A3	http://www.genome.jp/kegg-bin/show_pathway?hsa05204/hsa:220%09red/hsa:1543%09red	img/hsa05204.html
Starch and sucrose metabolism	KEGG PATHWAY	hsa00500	1	36	0.556494	0.951091	GYG2	http://www.genome.jp/kegg-bin/show_pathway?hsa00500/hsa:8908%09red	img/hsa00500.html
Tyrosine metabolism	KEGG PATHWAY	hsa00350	1	36	0.556494	0.951091	ALDH1A3	http://www.genome.jp/kegg-bin/show_pathway?hsa00350/hsa:220%09red	img/hsa00350.html
Alanine, aspartate and glutamate metabolism	KEGG PATHWAY	hsa00250	1	36	0.556494	0.951091	GFPT2	http://www.genome.jp/kegg-bin/show_pathway?hsa00250/hsa:9945%09red	img/hsa00250.html
Aldosterone-regulated sodium reabsorption	KEGG PATHWAY	hsa04960	1	37	0.566422	0.951091	PRKCB	http://www.genome.jp/kegg-bin/show_pathway?hsa04960/hsa:5579%09red	img/hsa04960.html
Vascular smooth muscle contraction	KEGG PATHWAY	hsa04270	3	132	0.567726	0.951091	PRKCB|NPPB|MYL9	http://www.genome.jp/kegg-bin/show_pathway?hsa04270/hsa:5579%09red/hsa:4879%09red/hsa:10398%09red	img/hsa04270.html
Cardiac muscle contraction	KEGG PATHWAY	hsa04260	2	86	0.575159	0.951091	CACNA2D3|CACNB2	http://www.genome.jp/kegg-bin/show_pathway?hsa04260/hsa:55799%09red/hsa:783%09red	img/hsa04260.html
Insulin secretion	KEGG PATHWAY	hsa04911	2	86	0.575159	0.951091	PRKCB|PCLO	http://www.genome.jp/kegg-bin/show_pathway?hsa04911/hsa:5579%09red/hsa:27445%09red	img/hsa04911.html
Ubiquitin mediated proteolysis	KEGG PATHWAY	hsa04120	3	137	0.593117	0.951091	BIRC7|NHLRC1|SKP2	http://www.genome.jp/kegg-bin/show_pathway?hsa04120/hsa:79444%09red/hsa:378884%09red/hsa:6502%09red	img/hsa04120.html
PD-L1 expression and PD-1 checkpoint pathway in cancer	KEGG PATHWAY	hsa05235	2	89	0.593926	0.951091	MYD88|TLR4	http://www.genome.jp/kegg-bin/show_pathway?hsa05235/hsa:7099%09red/hsa:4615%09red
Nicotine addiction	KEGG PATHWAY	hsa05033	1	40	0.594898	0.951091	GABRB3	http://www.genome.jp/kegg-bin/show_pathway?hsa05033/hsa:2562%09red	img/hsa05033.html
Kaposi sarcoma-associated herpesvirus infection	KEGG PATHWAY	hsa05167	4	186	0.599204	0.951091	CLEC2B|PDGFB|CCR3|IKBKE	http://www.genome.jp/kegg-bin/show_pathway?hsa05167/hsa:1232%09red/hsa:5155%09red/hsa:9641%09red/hsa:9976%09red	img/hsa05167.html
Fat digestion and absorption	KEGG PATHWAY	hsa04975	1	41	0.60397	0.951091	NPC1L1	http://www.genome.jp/kegg-bin/show_pathway?hsa04975/hsa:29881%09red	img/hsa04975.html
Rheumatoid arthritis	KEGG PATHWAY	hsa05323	2	91	0.606092	0.951091	TCIRG1|TLR4	http://www.genome.jp/kegg-bin/show_pathway?hsa05323/hsa:7099%09red/hsa:10312%09red	img/hsa05323.html
Signaling pathways regulating pluripotency of stem cells	KEGG PATHWAY	hsa04550	3	140	0.607886	0.951091	FZD8|WNT5A|FGFR1	http://www.genome.jp/kegg-bin/show_pathway?hsa04550/hsa:7474%09red/hsa:2260%09red/hsa:8325%09red	img/hsa04550.html
Tryptophan metabolism	KEGG PATHWAY	hsa00380	1	42	0.612841	0.951091	CYP1A1	http://www.genome.jp/kegg-bin/show_pathway?hsa00380/hsa:1543%09red	img/hsa00380.html
GnRH signaling pathway	KEGG PATHWAY	hsa04912	2	93	0.617983	0.951091	EGR1|PRKCB	http://www.genome.jp/kegg-bin/show_pathway?hsa04912/hsa:5579%09red/hsa:1958%09red	img/hsa04912.html
Vasopressin-regulated water reabsorption	KEGG PATHWAY	hsa04962	1	44	0.629994	0.951091	ARHGDIB	http://www.genome.jp/kegg-bin/show_pathway?hsa04962/hsa:397%09red	img/hsa04962.html
Endocytosis	KEGG PATHWAY	hsa04144	5	244	0.638684	0.951091	HSPA1B|HSPA1A|HSPA8|PSD|HSPA2	http://www.genome.jp/kegg-bin/show_pathway?hsa04144/hsa:3304%09red/hsa:3306%09red/hsa:5662%09red/hsa:3312%09red/hsa:3303%09red	img/hsa04144.html
Cytokine-cytokine receptor interaction	KEGG PATHWAY	hsa04060	6	294	0.645053	0.951091	TNFSF15|IL31RA|TNFSF14|IL21R|GDF6|CCR3	http://www.genome.jp/kegg-bin/show_pathway?hsa04060/hsa:1232%09red/hsa:392255%09red/hsa:133396%09red/hsa:50615%09red/hsa:9966%09red/hsa:8740%09red	img/hsa04060.html
Phospholipase D signaling pathway	KEGG PATHWAY	hsa04072	3	148	0.645511	0.951091	PDGFRB|PDGFB|SHC3	http://www.genome.jp/kegg-bin/show_pathway?hsa04072/hsa:5155%09red/hsa:5159%09red/hsa:53358%09red	img/hsa04072.html
Aldosterone synthesis and secretion	KEGG PATHWAY	hsa04925	2	98	0.646504	0.951091	PRKCB|CYP11A1	http://www.genome.jp/kegg-bin/show_pathway?hsa04925/hsa:5579%09red/hsa:1583%09red	img/hsa04925.html
Adrenergic signaling in cardiomyocytes	KEGG PATHWAY	hsa04261	3	149	0.650032	0.951091	PPP1R1A|CACNA2D3|CACNB2	http://www.genome.jp/kegg-bin/show_pathway?hsa04261/hsa:55799%09red/hsa:783%09red/hsa:5502%09red	img/hsa04261.html
Phosphatidylinositol signaling system	KEGG PATHWAY	hsa04070	2	99	0.652003	0.951091	IMPA2|PRKCB	http://www.genome.jp/kegg-bin/show_pathway?hsa04070/hsa:5579%09red/hsa:3613%09red	img/hsa04070.html
Hedgehog signaling pathway	KEGG PATHWAY	hsa04340	1	47	0.654316	0.951091	CCND2	http://www.genome.jp/kegg-bin/show_pathway?hsa04340/hsa:894%09red	img/hsa04340.html
Ether lipid metabolism	KEGG PATHWAY	hsa00565	1	47	0.654316	0.951091	GAL3ST1	http://www.genome.jp/kegg-bin/show_pathway?hsa00565/hsa:9514%09red	img/hsa00565.html
AGE-RAGE signaling pathway in diabetic complications	KEGG PATHWAY	hsa04933	2	100	0.657434	0.951091	EGR1|PRKCB	http://www.genome.jp/kegg-bin/show_pathway?hsa04933/hsa:5579%09red/hsa:1958%09red	img/hsa04933.html
Viral protein interaction with cytokine and cytokine receptor	KEGG PATHWAY	hsa04061	2	100	0.657434	0.951091	CCR3|TNFSF14	http://www.genome.jp/kegg-bin/show_pathway?hsa04061/hsa:1232%09red/hsa:8740%09red
Cysteine and methionine metabolism	KEGG PATHWAY	hsa00270	1	49	0.669641	0.951091	TST	http://www.genome.jp/kegg-bin/show_pathway?hsa00270/hsa:7263%09red	img/hsa00270.html
Cushing syndrome	KEGG PATHWAY	hsa04934	3	155	0.6763	0.951091	FZD8|WNT5A|CYP11A1	http://www.genome.jp/kegg-bin/show_pathway?hsa04934/hsa:7474%09red/hsa:1583%09red/hsa:8325%09red
Hepatitis C	KEGG PATHWAY	hsa05160	3	155	0.6763	0.951091	CLDN23|CLDN2|IKBKE	http://www.genome.jp/kegg-bin/show_pathway?hsa05160/hsa:137075%09red/hsa:9075%09red/hsa:9641%09red	img/hsa05160.html
Vibrio cholerae infection	KEGG PATHWAY	hsa05110	1	50	0.677048	0.951091	TCIRG1	http://www.genome.jp/kegg-bin/show_pathway?hsa05110/hsa:10312%09red	img/hsa05110.html
Arginine and proline metabolism	KEGG PATHWAY	hsa00330	1	50	0.677048	0.951091	HOGA1	http://www.genome.jp/kegg-bin/show_pathway?hsa00330/hsa:112817%09red	img/hsa00330.html
Endocrine and other factor-regulated calcium reabsorption	KEGG PATHWAY	hsa04961	1	50	0.677048	0.951091	PRKCB	http://www.genome.jp/kegg-bin/show_pathway?hsa04961/hsa:5579%09red	img/hsa04961.html
Amyotrophic lateral sclerosis (ALS)	KEGG PATHWAY	hsa05014	1	51	0.68429	0.955576	CASP1	http://www.genome.jp/kegg-bin/show_pathway?hsa05014/hsa:834%09red	img/hsa05014.html
Cholinergic synapse	KEGG PATHWAY	hsa04725	2	112	0.717441	0.968139	CHRM5|PRKCB	http://www.genome.jp/kegg-bin/show_pathway?hsa04725/hsa:5579%09red/hsa:1133%09red	img/hsa04725.html
Glutathione metabolism	KEGG PATHWAY	hsa00480	1	56	0.718148	0.968139	IDH2	http://www.genome.jp/kegg-bin/show_pathway?hsa00480/hsa:3418%09red	img/hsa00480.html
Pyrimidine metabolism	KEGG PATHWAY	hsa00240	1	57	0.724473	0.968139	DPYS	http://www.genome.jp/kegg-bin/show_pathway?hsa00240/hsa:1807%09red	img/hsa00240.html
Serotonergic synapse	KEGG PATHWAY	hsa04726	2	115	0.730998	0.968139	GABRB3|PRKCB	http://www.genome.jp/kegg-bin/show_pathway?hsa04726/hsa:5579%09red/hsa:2562%09red	img/hsa04726.html
Carbon metabolism	KEGG PATHWAY	hsa01200	2	117	0.739729	0.968139	IDH2|ALDOC	http://www.genome.jp/kegg-bin/show_pathway?hsa01200/hsa:3418%09red/hsa:230%09red	img/hsa01200.html
Viral myocarditis	KEGG PATHWAY	hsa05416	1	60	0.742614	0.968139	LAMA1	http://www.genome.jp/kegg-bin/show_pathway?hsa05416/hsa:284217%09red	img/hsa05416.html
Long-term depression	KEGG PATHWAY	hsa04730	1	60	0.742614	0.968139	PRKCB	http://www.genome.jp/kegg-bin/show_pathway?hsa04730/hsa:5579%09red	img/hsa04730.html
Neurotrophin signaling pathway	KEGG PATHWAY	hsa04722	2	119	0.748218	0.968139	ARHGDIB|SHC3	http://www.genome.jp/kegg-bin/show_pathway?hsa04722/hsa:397%09red/hsa:53358%09red	img/hsa04722.html
Sphingolipid signaling pathway	KEGG PATHWAY	hsa04071	2	119	0.748218	0.968139	PRKCB|SPTLC3	http://www.genome.jp/kegg-bin/show_pathway?hsa04071/hsa:5579%09red/hsa:55304%09red	img/hsa04071.html
Glycerolipid metabolism	KEGG PATHWAY	hsa00561	1	61	0.748393	0.968139	LIPC	http://www.genome.jp/kegg-bin/show_pathway?hsa00561/hsa:3990%09red	img/hsa00561.html
Cell cycle	KEGG PATHWAY	hsa04110	2	124	0.768411	0.968139	CCND2|SKP2	http://www.genome.jp/kegg-bin/show_pathway?hsa04110/hsa:894%09red/hsa:6502%09red	img/hsa04110.html
Platelet activation	KEGG PATHWAY	hsa04611	2	124	0.768411	0.968139	VWF|FGB	http://www.genome.jp/kegg-bin/show_pathway?hsa04611/hsa:7450%09red/hsa:2244%09red	img/hsa04611.html
Cortisol synthesis and secretion	KEGG PATHWAY	hsa04927	1	65	0.770248	0.968139	CYP11A1	http://www.genome.jp/kegg-bin/show_pathway?hsa04927/hsa:1583%09red
Mitophagy - animal	KEGG PATHWAY	hsa04137	1	65	0.770248	0.968139	ATG9B	http://www.genome.jp/kegg-bin/show_pathway?hsa04137/hsa:285973%09red	img/hsa04137.html
Non-small cell lung cancer	KEGG PATHWAY	hsa05223	1	66	0.77541	0.968139	PRKCB	http://www.genome.jp/kegg-bin/show_pathway?hsa05223/hsa:5579%09red	img/hsa05223.html
Acute myeloid leukemia	KEGG PATHWAY	hsa05221	1	66	0.77541	0.968139	CD14	http://www.genome.jp/kegg-bin/show_pathway?hsa05221/hsa:929%09red	img/hsa05221.html
Amphetamine addiction	KEGG PATHWAY	hsa05031	1	68	0.78539	0.968139	PRKCB	http://www.genome.jp/kegg-bin/show_pathway?hsa05031/hsa:5579%09red	img/hsa05031.html
Fc epsilon RI signaling pathway	KEGG PATHWAY	hsa04664	1	68	0.78539	0.968139	ALOX5AP	http://www.genome.jp/kegg-bin/show_pathway?hsa04664/hsa:241%09red	img/hsa04664.html
Renal cell carcinoma	KEGG PATHWAY	hsa05211	1	69	0.790214	0.968139	PDGFB	http://www.genome.jp/kegg-bin/show_pathway?hsa05211/hsa:5155%09red	img/hsa05211.html
Natural killer cell mediated cytotoxicity	KEGG PATHWAY	hsa04650	2	131	0.79432	0.968139	PRKCB|SHC3	http://www.genome.jp/kegg-bin/show_pathway?hsa04650/hsa:5579%09red/hsa:53358%09red	img/hsa04650.html
Dopaminergic synapse	KEGG PATHWAY	hsa04728	2	131	0.79432	0.968139	GNAL|PRKCB	http://www.genome.jp/kegg-bin/show_pathway?hsa04728/hsa:5579%09red/hsa:2774%09red	img/hsa04728.html
RIG-I-like receptor signaling pathway	KEGG PATHWAY	hsa04622	1	70	0.79493	0.968139	IKBKE	http://www.genome.jp/kegg-bin/show_pathway?hsa04622/hsa:9641%09red	img/hsa04622.html
Epithelial cell signaling in Helicobacter pylori infection	KEGG PATHWAY	hsa05120	1	70	0.79493	0.968139	TCIRG1	http://www.genome.jp/kegg-bin/show_pathway?hsa05120/hsa:10312%09red	img/hsa05120.html
FoxO signaling pathway	KEGG PATHWAY	hsa04068	2	132	0.797806	0.968139	CCND2|SKP2	http://www.genome.jp/kegg-bin/show_pathway?hsa04068/hsa:894%09red/hsa:6502%09red	img/hsa04068.html
Chemokine signaling pathway	KEGG PATHWAY	hsa04062	3	190	0.800938	0.968139	CCR3|PRKCB|SHC3	http://www.genome.jp/kegg-bin/show_pathway?hsa04062/hsa:1232%09red/hsa:5579%09red/hsa:53358%09red	img/hsa04062.html
Bile secretion	KEGG PATHWAY	hsa04976	1	72	0.804048	0.968139	SLC51B	http://www.genome.jp/kegg-bin/show_pathway?hsa04976/hsa:123264%09red	img/hsa04976.html
p53 signaling pathway	KEGG PATHWAY	hsa04115	1	72	0.804048	0.968139	CCND2	http://www.genome.jp/kegg-bin/show_pathway?hsa04115/hsa:894%09red	img/hsa04115.html
Inositol phosphate metabolism	KEGG PATHWAY	hsa00562	1	74	0.812762	0.973664	IMPA2	http://www.genome.jp/kegg-bin/show_pathway?hsa00562/hsa:3613%09red	img/hsa00562.html
Parkinson disease	KEGG PATHWAY	hsa05012	2	142	0.829897	0.974099	GNAL|GPR37	http://www.genome.jp/kegg-bin/show_pathway?hsa05012/hsa:2774%09red/hsa:2861%09red	img/hsa05012.html
Viral carcinogenesis	KEGG PATHWAY	hsa05203	3	201	0.830783	0.974099	CCR3|CCND2|SKP2	http://www.genome.jp/kegg-bin/show_pathway?hsa05203/hsa:1232%09red/hsa:894%09red/hsa:6502%09red	img/hsa05203.html
Drug metabolism - other enzymes	KEGG PATHWAY	hsa00983	1	79	0.832899	0.974099	DPYS	http://www.genome.jp/kegg-bin/show_pathway?hsa00983/hsa:1807%09red	img/hsa00983.html
Retrograde endocannabinoid signaling	KEGG PATHWAY	hsa04723	2	148	0.846889	0.974099	GABRB3|PRKCB	http://www.genome.jp/kegg-bin/show_pathway?hsa04723/hsa:5579%09red/hsa:2562%09red	img/hsa04723.html
Taste transduction	KEGG PATHWAY	hsa04742	1	83	0.847446	0.974099	GABBR2	http://www.genome.jp/kegg-bin/show_pathway?hsa04742/hsa:9568%09red	img/hsa04742.html
Human immunodeficiency virus 1 infection	KEGG PATHWAY	hsa05170	3	212	0.856732	0.974099	MYD88|TLR4|PRKCB	http://www.genome.jp/kegg-bin/show_pathway?hsa05170/hsa:5579%09red/hsa:7099%09red/hsa:4615%09red
cAMP signaling pathway	KEGG PATHWAY	hsa04024	3	214	0.86106	0.974099	HCAR1|GABBR2|MYL9	http://www.genome.jp/kegg-bin/show_pathway?hsa04024/hsa:27198%09red/hsa:9568%09red/hsa:10398%09red	img/hsa04024.html
Salivary secretion	KEGG PATHWAY	hsa04970	1	90	0.869937	0.974099	PRKCB	http://www.genome.jp/kegg-bin/show_pathway?hsa04970/hsa:5579%09red	img/hsa04970.html
Human T-cell leukemia virus 1 infection	KEGG PATHWAY	hsa05166	3	219	0.871385	0.974099	CCND2|EGR1|TERT	http://www.genome.jp/kegg-bin/show_pathway?hsa05166/hsa:894%09red/hsa:1958%09red/hsa:7015%09red	img/hsa05166.html
Th1 and Th2 cell differentiation	KEGG PATHWAY	hsa04658	1	92	0.875735	0.974099	RUNX3	http://www.genome.jp/kegg-bin/show_pathway?hsa04658/hsa:864%09red	img/hsa04658.html
IL-17 signaling pathway	KEGG PATHWAY	hsa04657	1	93	0.878536	0.974099	IKBKE	http://www.genome.jp/kegg-bin/show_pathway?hsa04657/hsa:9641%09red	img/hsa04657.html
Necroptosis	KEGG PATHWAY	hsa04217	2	162	0.880719	0.974099	TLR4|CASP1	http://www.genome.jp/kegg-bin/show_pathway?hsa04217/hsa:834%09red/hsa:7099%09red	img/hsa04217.html
Fc gamma R-mediated phagocytosis	KEGG PATHWAY	hsa04666	1	94	0.881275	0.974099	PRKCB	http://www.genome.jp/kegg-bin/show_pathway?hsa04666/hsa:5579%09red	img/hsa04666.html
Circadian entrainment	KEGG PATHWAY	hsa04713	1	97	0.889129	0.974099	PRKCB	http://www.genome.jp/kegg-bin/show_pathway?hsa04713/hsa:5579%09red	img/hsa04713.html
cGMP-PKG signaling pathway	KEGG PATHWAY	hsa04022	2	167	0.891037	0.974099	NPPB|MYL9	http://www.genome.jp/kegg-bin/show_pathway?hsa04022/hsa:4879%09red/hsa:10398%09red	img/hsa04022.html
Pancreatic secretion	KEGG PATHWAY	hsa04972	1	98	0.89163	0.974099	PRKCB	http://www.genome.jp/kegg-bin/show_pathway?hsa04972/hsa:5579%09red	img/hsa04972.html
Endocrine resistance	KEGG PATHWAY	hsa01522	1	98	0.89163	0.974099	SHC3	http://www.genome.jp/kegg-bin/show_pathway?hsa01522/hsa:53358%09red	img/hsa01522.html
Thermogenesis	KEGG PATHWAY	hsa04714	3	231	0.893461	0.974099	DPF3|NPPB|FGFR1	http://www.genome.jp/kegg-bin/show_pathway?hsa04714/hsa:8110%09red/hsa:2260%09red/hsa:4879%09red
Inflammatory mediator regulation of TRP channels	KEGG PATHWAY	hsa04750	1	100	0.896465	0.974099	PRKCB	http://www.genome.jp/kegg-bin/show_pathway?hsa04750/hsa:5579%09red	img/hsa04750.html
Alzheimer disease	KEGG PATHWAY	hsa05010	2	171	0.898691	0.974099	MME|APOE	http://www.genome.jp/kegg-bin/show_pathway?hsa05010/hsa:4311%09red/hsa:348%09red	img/hsa05010.html
Ribosome biogenesis in eukaryotes	KEGG PATHWAY	hsa03008	1	102	0.901086	0.974099	RMRP	http://www.genome.jp/kegg-bin/show_pathway?hsa03008/hsa:6023%09red	img/hsa03008.html
Th17 cell differentiation	KEGG PATHWAY	hsa04659	1	107	0.911761	0.974099	IL21R	http://www.genome.jp/kegg-bin/show_pathway?hsa04659/hsa:50615%09red	img/hsa04659.html
Transcriptional misregulation in cancer	KEGG PATHWAY	hsa05202	2	186	0.923166	0.974099	CD14|CCND2	http://www.genome.jp/kegg-bin/show_pathway?hsa05202/hsa:894%09red/hsa:929%09red	img/hsa05202.html
Glutamatergic synapse	KEGG PATHWAY	hsa04724	1	114	0.924808	0.974099	PRKCB	http://www.genome.jp/kegg-bin/show_pathway?hsa04724/hsa:5579%09red	img/hsa04724.html
Huntington disease	KEGG PATHWAY	hsa05016	2	193	0.932585	0.974099	TGM2|DNAH11	http://www.genome.jp/kegg-bin/show_pathway?hsa05016/hsa:8701%09red/hsa:7052%09red	img/hsa05016.html
Thyroid hormone signaling pathway	KEGG PATHWAY	hsa04919	1	119	0.932934	0.974099	PRKCB	http://www.genome.jp/kegg-bin/show_pathway?hsa04919/hsa:5579%09red	img/hsa04919.html
Lysosome	KEGG PATHWAY	hsa04142	1	123	0.938802	0.974099	TCIRG1	http://www.genome.jp/kegg-bin/show_pathway?hsa04142/hsa:10312%09red	img/hsa04142.html
Autophagy - animal	KEGG PATHWAY	hsa04140	1	128	0.945423	0.974099	ATG9B	http://www.genome.jp/kegg-bin/show_pathway?hsa04140/hsa:285973%09red	img/hsa04140.html
Osteoclast differentiation	KEGG PATHWAY	hsa04380	1	128	0.945423	0.974099	OSCAR	http://www.genome.jp/kegg-bin/show_pathway?hsa04380/hsa:126014%09red	img/hsa04380.html
Purine metabolism	KEGG PATHWAY	hsa00230	1	130	0.947868	0.974099	AK8	http://www.genome.jp/kegg-bin/show_pathway?hsa00230/hsa:158067%09red	img/hsa00230.html
Relaxin signaling pathway	KEGG PATHWAY	hsa04926	1	130	0.947868	0.974099	SHC3	http://www.genome.jp/kegg-bin/show_pathway?hsa04926/hsa:53358%09red
Oxidative phosphorylation	KEGG PATHWAY	hsa00190	1	133	0.951332	0.974099	TCIRG1	http://www.genome.jp/kegg-bin/show_pathway?hsa00190/hsa:10312%09red	img/hsa00190.html
Insulin signaling pathway	KEGG PATHWAY	hsa04910	1	137	0.955597	0.974099	SHC3	http://www.genome.jp/kegg-bin/show_pathway?hsa04910/hsa:53358%09red	img/hsa04910.html
Apelin signaling pathway	KEGG PATHWAY	hsa04371	1	137	0.955597	0.974099	EGR1	http://www.genome.jp/kegg-bin/show_pathway?hsa04371/hsa:1958%09red	img/hsa04371.html
Fluid shear stress and atherosclerosis	KEGG PATHWAY	hsa05418	1	139	0.957589	0.974099	PDGFB	http://www.genome.jp/kegg-bin/show_pathway?hsa05418/hsa:5155%09red	img/hsa05418.html
Human cytomegalovirus infection	KEGG PATHWAY	hsa05163	2	225	0.963374	0.975778	CCR3|PRKCB	http://www.genome.jp/kegg-bin/show_pathway?hsa05163/hsa:1232%09red/hsa:5579%09red
Cellular senescence	KEGG PATHWAY	hsa04218	1	160	0.973821	0.982144	CCND2	http://www.genome.jp/kegg-bin/show_pathway?hsa04218/hsa:894%09red
Alcoholism	KEGG PATHWAY	hsa05034	1	180	0.983486	0.987671	SHC3	http://www.genome.jp/kegg-bin/show_pathway?hsa05034/hsa:53358%09red	img/hsa05034.html
Olfactory transduction	KEGG PATHWAY	hsa04740	1	445	0.999967	0.999967	GNAL	http://www.genome.jp/kegg-bin/show_pathway?hsa04740/hsa:2774%09red	img/hsa04740.html

## Sheet: Down_KEGG_pathway
Term	Database	ID	Input number	Background number	P-Value	Corrected P-Value	Input	Hyperlink	img
Cytokine-cytokine receptor interaction	KEGG PATHWAY	hsa04060	19	294	6.29485e-08	1.32192e-05	CCL2|CXCL3|CXCL2|IL10RA|CCL5|CXCL8|CSF1R|CSF1|IL12A|CSF3|IL6|TNF|TNFRSF8|TNFRSF11A|NGF|CCL20|IL1A|GDF15|IL36G	http://www.genome.jp/kegg-bin/show_pathway?hsa04060/hsa:3569%09red/hsa:3552%09red/hsa:1435%09red/hsa:2921%09red/hsa:3592%09red/hsa:8792%09red/hsa:6364%09red/hsa:943%09red/hsa:4803%09red/hsa:3576%09red/hsa:6347%09red/hsa:1436%09red/hsa:9518%09red/hsa:1440%09red/hsa:6352%09red/hsa:2920%09red/hsa:3587%09red/hsa:7124%09red/hsa:56300%09red	img/hsa04060.html
Viral protein interaction with cytokine and cytokine receptor	KEGG PATHWAY	hsa04061	11	100	2.53078e-07	2.65732e-05	CCL2|CXCL3|CXCL2|IL10RA|CCL5|CXCL8|CSF1R|CSF1|IL6|TNF|CCL20	http://www.genome.jp/kegg-bin/show_pathway?hsa04061/hsa:3569%09red/hsa:1435%09red/hsa:1436%09red/hsa:2920%09red/hsa:7124%09red/hsa:6364%09red/hsa:3576%09red/hsa:6347%09red/hsa:6352%09red/hsa:2921%09red/hsa:3587%09red
TNF signaling pathway	KEGG PATHWAY	hsa04668	11	112	8.0606e-07	5.64242e-05	CCL2|CXCL3|CXCL2|CCL5|BIRC3|CSF1|MAP3K5|IL6|TNF|CCL20|JAG1	http://www.genome.jp/kegg-bin/show_pathway?hsa04668/hsa:3569%09red/hsa:1435%09red/hsa:2921%09red/hsa:2920%09red/hsa:7124%09red/hsa:6364%09red/hsa:6347%09red/hsa:4217%09red/hsa:6352%09red/hsa:182%09red/hsa:330%09red	img/hsa04668.html
Malaria	KEGG PATHWAY	hsa05144	7	49	7.36557e-06	0.000335599	CCL2|CXCL8|THBS2|IL12A|CSF3|IL6|TNF	http://www.genome.jp/kegg-bin/show_pathway?hsa05144/hsa:3569%09red/hsa:3592%09red/hsa:7124%09red/hsa:3576%09red/hsa:6347%09red/hsa:1440%09red/hsa:7058%09red	img/hsa05144.html
Rheumatoid arthritis	KEGG PATHWAY	hsa05323	9	91	8.0121e-06	0.000335599	CCL2|CCL5|CXCL8|CSF1|IL6|TNF|TNFRSF11A|CCL20|IL1A	http://www.genome.jp/kegg-bin/show_pathway?hsa05323/hsa:3569%09red/hsa:3552%09red/hsa:1435%09red/hsa:8792%09red/hsa:6364%09red/hsa:3576%09red/hsa:6347%09red/hsa:7124%09red/hsa:6352%09red	img/hsa05323.html
IL-17 signaling pathway	KEGG PATHWAY	hsa04657	9	93	9.58854e-06	0.000335599	CCL2|CXCL3|CXCL2|DEFB4A|CXCL8|CSF3|IL6|TNF|CCL20	http://www.genome.jp/kegg-bin/show_pathway?hsa04657/hsa:3569%09red/hsa:2921%09red/hsa:2920%09red/hsa:7124%09red/hsa:6364%09red/hsa:3576%09red/hsa:6347%09red/hsa:1440%09red/hsa:1673%09red	img/hsa04657.html
MAPK signaling pathway	KEGG PATHWAY	hsa04010	14	295	0.00012613	0.00378389	NFATC1|NGF|RASGRP1|CSF1R|EPHA2|GADD45G|TNF|EREG|MAPT|IL1A|PLA2G4A|MAP3K5|FGF2|CSF1	http://www.genome.jp/kegg-bin/show_pathway?hsa04010/hsa:3552%09red/hsa:1435%09red/hsa:1436%09red/hsa:5321%09red/hsa:10125%09red/hsa:4803%09red/hsa:4772%09red/hsa:2247%09red/hsa:4217%09red/hsa:7124%09red/hsa:4137%09red/hsa:10912%09red/hsa:2069%09red/hsa:1969%09red	img/hsa04010.html
Legionellosis	KEGG PATHWAY	hsa05134	6	55	0.000160998	0.00422619	CXCL3|CXCL2|CXCL8|IL12A|IL6|TNF	http://www.genome.jp/kegg-bin/show_pathway?hsa05134/hsa:3569%09red/hsa:2921%09red/hsa:2920%09red/hsa:7124%09red/hsa:3592%09red/hsa:3576%09red	img/hsa05134.html
Basal cell carcinoma	KEGG PATHWAY	hsa05217	6	63	0.000342256	0.00798597	WNT10B|TCF7L1|GADD45G|WNT9A|WNT4|WNT7B	http://www.genome.jp/kegg-bin/show_pathway?hsa05217/hsa:7477%09red/hsa:83439%09red/hsa:7483%09red/hsa:7480%09red/hsa:10912%09red/hsa:54361%09red	img/hsa05217.html
Transcriptional misregulation in cancer	KEGG PATHWAY	hsa05202	10	186	0.000463619	0.00973599	BCL2A1|BIRC3|TMPRSS2|CSF1R|HOXA11|GADD45G|IL6|PER2|CXCL8|UTY	http://www.genome.jp/kegg-bin/show_pathway?hsa05202/hsa:3569%09red/hsa:3207%09red/hsa:330%09red/hsa:7113%09red/hsa:1436%09red/hsa:597%09red/hsa:3576%09red/hsa:8864%09red/hsa:10912%09red/hsa:7404%09red	img/hsa05202.html
Hematopoietic cell lineage	KEGG PATHWAY	hsa04640	7	97	0.000608342	0.0113432	CD33|CSF1R|CSF1|CSF3|IL6|TNF|IL1A	http://www.genome.jp/kegg-bin/show_pathway?hsa04640/hsa:3569%09red/hsa:3552%09red/hsa:1435%09red/hsa:1436%09red/hsa:945%09red/hsa:7124%09red/hsa:1440%09red	img/hsa04640.html
Wnt signaling pathway	KEGG PATHWAY	hsa04310	9	160	0.000648182	0.0113432	NFATC1|NOTUM|WNT10B|RNF43|TCF7L1|WNT4|BAMBI|WNT9A|WNT7B	http://www.genome.jp/kegg-bin/show_pathway?hsa04310/hsa:7477%09red/hsa:83439%09red/hsa:54894%09red/hsa:4772%09red/hsa:147111%09red/hsa:7483%09red/hsa:7480%09red/hsa:54361%09red/hsa:25805%09red	img/hsa04310.html
NF-kappa B signaling pathway	KEGG PATHWAY	hsa04064	7	100	0.000730526	0.0118008	CXCL2|BCL2A1|CXCL8|BIRC3|TNF|TNFRSF11A|LCK	http://www.genome.jp/kegg-bin/show_pathway?hsa04064/hsa:3932%09red/hsa:2920%09red/hsa:8792%09red/hsa:3576%09red/hsa:597%09red/hsa:330%09red/hsa:7124%09red	img/hsa04064.html
Chagas disease (American trypanosomiasis)	KEGG PATHWAY	hsa05142	7	103	0.0008714	0.0123427	CCL2|CCL5|CXCL8|IL12A|IL6|TNF|PPP2R2C	http://www.genome.jp/kegg-bin/show_pathway?hsa05142/hsa:5522%09red/hsa:3569%09red/hsa:3592%09red/hsa:7124%09red/hsa:3576%09red/hsa:6347%09red/hsa:6352%09red	img/hsa05142.html
Influenza A	KEGG PATHWAY	hsa05164	9	167	0.00088162	0.0123427	CCL2|CCL5|CXCL8|TMPRSS2|IL12A|IL6|TNF|IL1A|RSAD2	http://www.genome.jp/kegg-bin/show_pathway?hsa05164/hsa:3569%09red/hsa:3552%09red/hsa:7113%09red/hsa:3592%09red/hsa:7124%09red/hsa:3576%09red/hsa:6347%09red/hsa:6352%09red/hsa:91543%09red	img/hsa05164.html
Apoptosis	KEGG PATHWAY	hsa04210	8	136	0.000972435	0.0127632	NGF|BCL2A1|BIRC3|GADD45G|TNF|SEPTIN4|MAP3K5|ERN1	http://www.genome.jp/kegg-bin/show_pathway?hsa04210/hsa:2081%09red/hsa:5414%09red/hsa:597%09red/hsa:4803%09red/hsa:4217%09red/hsa:7124%09red/hsa:10912%09red/hsa:330%09red	img/hsa04210.html
NOD-like receptor signaling pathway	KEGG PATHWAY	hsa04621	9	178	0.00138318	0.0170863	CCL2|CXCL3|CXCL2|DEFB4A|CCL5|CXCL8|BIRC3|IL6|TNF	http://www.genome.jp/kegg-bin/show_pathway?hsa04621/hsa:3569%09red/hsa:2921%09red/hsa:2920%09red/hsa:7124%09red/hsa:3576%09red/hsa:6347%09red/hsa:6352%09red/hsa:1673%09red/hsa:330%09red	img/hsa04621.html
Breast cancer	KEGG PATHWAY	hsa05224	8	147	0.00160582	0.0187346	JAG1|WNT10B|TCF7L1|GADD45G|WNT9A|WNT4|FGF2|WNT7B	http://www.genome.jp/kegg-bin/show_pathway?hsa05224/hsa:7477%09red/hsa:83439%09red/hsa:2247%09red/hsa:7483%09red/hsa:7480%09red/hsa:10912%09red/hsa:182%09red/hsa:54361%09red	img/hsa05224.html
Nitrogen metabolism	KEGG PATHWAY	hsa00910	3	17	0.00192773	0.0213065	CA9|CPS1|CA12	http://www.genome.jp/kegg-bin/show_pathway?hsa00910/hsa:768%09red/hsa:771%09red/hsa:1373%09red	img/hsa00910.html
Inflammatory bowel disease (IBD)	KEGG PATHWAY	hsa05321	5	65	0.00283205	0.0291809	IL6|IL1A|TNF|IL12A|NFATC1	http://www.genome.jp/kegg-bin/show_pathway?hsa05321/hsa:7124%09red/hsa:3569%09red/hsa:3552%09red/hsa:4772%09red/hsa:3592%09red	img/hsa05321.html
Acute myeloid leukemia	KEGG PATHWAY	hsa05221	5	66	0.00302802	0.0291809	PIM2|CSF1R|TCF7L1|PER2|BCL2A1	http://www.genome.jp/kegg-bin/show_pathway?hsa05221/hsa:597%09red/hsa:11040%09red/hsa:83439%09red/hsa:8864%09red/hsa:1436%09red	img/hsa05221.html
Osteoclast differentiation	KEGG PATHWAY	hsa04380	7	128	0.00305705	0.0291809	NFATC1|CSF1R|CSF1|TNF|TNFRSF11A|IL1A|LCK	http://www.genome.jp/kegg-bin/show_pathway?hsa04380/hsa:3552%09red/hsa:1435%09red/hsa:1436%09red/hsa:7124%09red/hsa:8792%09red/hsa:4772%09red/hsa:3932%09red	img/hsa04380.html
AGE-RAGE signaling pathway in diabetic complications	KEGG PATHWAY	hsa04933	6	100	0.00383122	0.0349807	CCL2|NFATC1|CXCL8|IL6|TNF|IL1A	http://www.genome.jp/kegg-bin/show_pathway?hsa04933/hsa:3569%09red/hsa:3552%09red/hsa:7124%09red/hsa:3576%09red/hsa:4772%09red/hsa:6347%09red	img/hsa04933.html
Toll-like receptor signaling pathway	KEGG PATHWAY	hsa04620	6	104	0.00464657	0.0406575	CCL5|CXCL8|IL12A|IL6|TLR1|TNF	http://www.genome.jp/kegg-bin/show_pathway?hsa04620/hsa:3569%09red/hsa:7096%09red/hsa:3592%09red/hsa:7124%09red/hsa:3576%09red/hsa:6352%09red	img/hsa04620.html
Pertussis	KEGG PATHWAY	hsa05133	5	76	0.00555999	0.0467039	IL6|IL1A|TNF|IL12A|CXCL8	http://www.genome.jp/kegg-bin/show_pathway?hsa05133/hsa:7124%09red/hsa:3569%09red/hsa:3552%09red/hsa:3576%09red/hsa:3592%09red	img/hsa05133.html
Cell adhesion molecules (CAMs)	KEGG PATHWAY	hsa04514	7	146	0.00628907	0.0507964	SELL|NLGN1|CD274|NLGN4Y|ICAM2|ESAM|ICOSLG	http://www.genome.jp/kegg-bin/show_pathway?hsa04514/hsa:3384%09red/hsa:22871%09red/hsa:90952%09red/hsa:29126%09red/hsa:22829%09red/hsa:6402%09red/hsa:23308%09red	img/hsa04514.html
Gastric cancer	KEGG PATHWAY	hsa05226	7	149	0.00701101	0.0545301	WNT10B|TCF7L1|GADD45G|WNT9A|WNT4|FGF2|WNT7B	http://www.genome.jp/kegg-bin/show_pathway?hsa05226/hsa:7477%09red/hsa:83439%09red/hsa:2247%09red/hsa:7483%09red/hsa:7480%09red/hsa:10912%09red/hsa:54361%09red
Salmonella infection	KEGG PATHWAY	hsa05132	5	83	0.00804398	0.0603298	IL6|IL1A|CXCL3|CXCL2|CXCL8	http://www.genome.jp/kegg-bin/show_pathway?hsa05132/hsa:3569%09red/hsa:3552%09red/hsa:3576%09red/hsa:2921%09red/hsa:2920%09red	img/hsa05132.html
Hippo signaling pathway	KEGG PATHWAY	hsa04390	7	154	0.00834887	0.0604573	WNT10B|TCF7L1|PPP2R2C|RASSF6|WNT9A|WNT4|WNT7B	http://www.genome.jp/kegg-bin/show_pathway?hsa04390/hsa:5522%09red/hsa:7477%09red/hsa:83439%09red/hsa:166824%09red/hsa:7483%09red/hsa:7480%09red/hsa:54361%09red	img/hsa04390.html
Yersinia infection	KEGG PATHWAY	hsa05135	6	121	0.00958742	0.0671119	CCL2|NFATC1|CXCL8|IL6|TNF|LCK	http://www.genome.jp/kegg-bin/show_pathway?hsa05135/hsa:3569%09red/hsa:7124%09red/hsa:3576%09red/hsa:4772%09red/hsa:6347%09red/hsa:3932%09red
Circadian rhythm	KEGG PATHWAY	hsa04710	3	31	0.01094	0.0741099	PER3|NR1D1|PER2	http://www.genome.jp/kegg-bin/show_pathway?hsa04710/hsa:8863%09red/hsa:8864%09red/hsa:9572%09red	img/hsa04710.html
Pathways in cancer	KEGG PATHWAY	hsa05200	15	530	0.0127202	0.0834765	RASGRP1|PIM2|JAG1|WNT10B|CSF1R|TCF7L1|IL12A|GADD45G|IL6|WNT9A|CXCL8|BIRC3|WNT4|FGF2|WNT7B	http://www.genome.jp/kegg-bin/show_pathway?hsa05200/hsa:3569%09red/hsa:83439%09red/hsa:11040%09red/hsa:1436%09red/hsa:3592%09red/hsa:10125%09red/hsa:2247%09red/hsa:3576%09red/hsa:7483%09red/hsa:182%09red/hsa:7480%09red/hsa:10912%09red/hsa:330%09red/hsa:7477%09red/hsa:54361%09red	img/hsa05200.html
Prion diseases	KEGG PATHWAY	hsa05020	3	35	0.0152542	0.0970723	IL6|IL1A|CCL5	http://www.genome.jp/kegg-bin/show_pathway?hsa05020/hsa:3569%09red/hsa:3552%09red/hsa:6352%09red	img/hsa05020.html
African trypanosomiasis	KEGG PATHWAY	hsa05143	3	37	0.0177222	0.104964	IL6|TNF|IL12A	http://www.genome.jp/kegg-bin/show_pathway?hsa05143/hsa:7124%09red/hsa:3569%09red/hsa:3592%09red	img/hsa05143.html
Melanogenesis	KEGG PATHWAY	hsa04916	5	101	0.0177548	0.104964	WNT10B|WNT7B|TCF7L1|WNT9A|WNT4	http://www.genome.jp/kegg-bin/show_pathway?hsa04916/hsa:7477%09red/hsa:83439%09red/hsa:7483%09red/hsa:54361%09red/hsa:7480%09red	img/hsa04916.html
Tuberculosis	KEGG PATHWAY	hsa05152	7	179	0.0179938	0.104964	IL10RA|IL12A|IL6|CD209|TLR1|IL1A|TNF	http://www.genome.jp/kegg-bin/show_pathway?hsa05152/hsa:30835%09red/hsa:3569%09red/hsa:3552%09red/hsa:3587%09red/hsa:7096%09red/hsa:3592%09red/hsa:7124%09red	img/hsa05152.html
Signaling pathways regulating pluripotency of stem cells	KEGG PATHWAY	hsa04550	6	140	0.0186297	0.105736	SMAD9|WNT10B|WNT4|WNT9A|FGF2|WNT7B	http://www.genome.jp/kegg-bin/show_pathway?hsa04550/hsa:7477%09red/hsa:2247%09red/hsa:4093%09red/hsa:7483%09red/hsa:7480%09red/hsa:54361%09red	img/hsa04550.html
C-type lectin receptor signaling pathway	KEGG PATHWAY	hsa04625	5	104	0.019901	0.109979	IL6|CD209|TNF|IL12A|NFATC1	http://www.genome.jp/kegg-bin/show_pathway?hsa04625/hsa:30835%09red/hsa:3569%09red/hsa:7124%09red/hsa:4772%09red/hsa:3592%09red
Epithelial cell signaling in Helicobacter pylori infection	KEGG PATHWAY	hsa05120	4	70	0.0207546	0.111755	CXCL8|CXCL3|CXCL2|CCL5	http://www.genome.jp/kegg-bin/show_pathway?hsa05120/hsa:2920%09red/hsa:6352%09red/hsa:2921%09red/hsa:3576%09red	img/hsa05120.html
Graft-versus-host disease	KEGG PATHWAY	hsa05332	3	41	0.0232877	0.122261	IL6|IL1A|TNF	http://www.genome.jp/kegg-bin/show_pathway?hsa05332/hsa:7124%09red/hsa:3569%09red/hsa:3552%09red	img/hsa05332.html
Non-alcoholic fatty liver disease (NAFLD)	KEGG PATHWAY	hsa04932	6	149	0.0244729	0.125349	CXCL8|MAP3K5|IL6|TNF|IL1A|ERN1	http://www.genome.jp/kegg-bin/show_pathway?hsa04932/hsa:3569%09red/hsa:3552%09red/hsa:2081%09red/hsa:7124%09red/hsa:3576%09red/hsa:4217%09red	img/hsa04932.html
Human papillomavirus infection	KEGG PATHWAY	hsa05165	10	330	0.0263437	0.128863	TCF7L1|WNT10B|THBS2|OASL|PPP2R2C|WNT4|TNF|WNT9A|JAG1|WNT7B	http://www.genome.jp/kegg-bin/show_pathway?hsa05165/hsa:5522%09red/hsa:7477%09red/hsa:83439%09red/hsa:7124%09red/hsa:7483%09red/hsa:7480%09red/hsa:182%09red/hsa:7058%09red/hsa:8638%09red/hsa:54361%09red
Type I diabetes mellitus	KEGG PATHWAY	hsa04940	3	43	0.0263863	0.128863	IL1A|TNF|IL12A	http://www.genome.jp/kegg-bin/show_pathway?hsa04940/hsa:7124%09red/hsa:3552%09red/hsa:3592%09red	img/hsa04940.html
Cushing syndrome	KEGG PATHWAY	hsa04934	6	155	0.0289859	0.138342	WNT10B|TCF7L1|WNT4|WNT9A|PDE11A|WNT7B	http://www.genome.jp/kegg-bin/show_pathway?hsa04934/hsa:7477%09red/hsa:83439%09red/hsa:50940%09red/hsa:7483%09red/hsa:7480%09red/hsa:54361%09red
Arginine biosynthesis	KEGG PATHWAY	hsa00220	2	21	0.0390256	0.178798	CPS1|NAGS	http://www.genome.jp/kegg-bin/show_pathway?hsa00220/hsa:1373%09red/hsa:162417%09red	img/hsa00220.html
PI3K-Akt signaling pathway	KEGG PATHWAY	hsa04151	10	354	0.0398263	0.178798	NGF|THBS2|CSF1R|EPHA2|PPP2R2C|CSF1|IL6|EREG|CSF3|FGF2	http://www.genome.jp/kegg-bin/show_pathway?hsa04151/hsa:5522%09red/hsa:3569%09red/hsa:1435%09red/hsa:1436%09red/hsa:4803%09red/hsa:2247%09red/hsa:1440%09red/hsa:2069%09red/hsa:7058%09red/hsa:1969%09red	img/hsa04151.html
Hepatocellular carcinoma	KEGG PATHWAY	hsa05225	6	168	0.040567	0.178798	WNT10B|TCF7L1|GADD45G|WNT9A|WNT4|WNT7B	http://www.genome.jp/kegg-bin/show_pathway?hsa05225/hsa:7477%09red/hsa:83439%09red/hsa:7483%09red/hsa:7480%09red/hsa:10912%09red/hsa:54361%09red
Amyotrophic lateral sclerosis (ALS)	KEGG PATHWAY	hsa05014	3	51	0.040868	0.178798	NEFL|TNF|MAP3K5	http://www.genome.jp/kegg-bin/show_pathway?hsa05014/hsa:4217%09red/hsa:7124%09red/hsa:4747%09red	img/hsa05014.html
PD-L1 expression and PD-1 checkpoint pathway in cancer	KEGG PATHWAY	hsa05235	4	89	0.044592	0.191108	NFATC1|RASGRP1|LCK|CD274	http://www.genome.jp/kegg-bin/show_pathway?hsa05235/hsa:3932%09red/hsa:10125%09red/hsa:4772%09red/hsa:29126%09red
Natural killer cell mediated cytotoxicity	KEGG PATHWAY	hsa04650	5	131	0.0470061	0.197426	NFATC1|ULBP1|LCK|TNF|ICAM2	http://www.genome.jp/kegg-bin/show_pathway?hsa04650/hsa:3384%09red/hsa:3932%09red/hsa:7124%09red/hsa:4772%09red/hsa:80329%09red	img/hsa04650.html
Th1 and Th2 cell differentiation	KEGG PATHWAY	hsa04658	4	92	0.0493396	0.203163	NFATC1|JAG1|LCK|IL12A	http://www.genome.jp/kegg-bin/show_pathway?hsa04658/hsa:3932%09red/hsa:182%09red/hsa:4772%09red/hsa:3592%09red	img/hsa04658.html
Human cytomegalovirus infection	KEGG PATHWAY	hsa05163	7	225	0.0524115	0.211662	CCL2|NFATC1|IL10RA|CCL5|CXCL8|IL6|TNF	http://www.genome.jp/kegg-bin/show_pathway?hsa05163/hsa:3569%09red/hsa:3587%09red/hsa:7124%09red/hsa:3576%09red/hsa:4772%09red/hsa:6347%09red/hsa:6352%09red
Amoebiasis	KEGG PATHWAY	hsa05146	4	95	0.054356	0.215373	IL6|CXCL8|TNF|IL12A	http://www.genome.jp/kegg-bin/show_pathway?hsa05146/hsa:7124%09red/hsa:3569%09red/hsa:3576%09red/hsa:3592%09red	img/hsa05146.html
Fluid shear stress and atherosclerosis	KEGG PATHWAY	hsa05418	5	139	0.0578874	0.225118	CCL2|IL1A|TNF|NPPC|MAP3K5	http://www.genome.jp/kegg-bin/show_pathway?hsa05418/hsa:4217%09red/hsa:7124%09red/hsa:3552%09red/hsa:4880%09red/hsa:6347%09red	img/hsa05418.html
Ras signaling pathway	KEGG PATHWAY	hsa04014	7	232	0.0598782	0.22837	NGF|RASGRP1|CSF1R|CSF1|EPHA2|PLA2G4A|FGF2	http://www.genome.jp/kegg-bin/show_pathway?hsa04014/hsa:1435%09red/hsa:1436%09red/hsa:5321%09red/hsa:10125%09red/hsa:4803%09red/hsa:2247%09red/hsa:1969%09red	img/hsa04014.html
Kaposi sarcoma-associated herpesvirus infection	KEGG PATHWAY	hsa05167	6	186	0.0608987	0.22837	NFATC1|CXCL3|CXCL2|CXCL8|IL6|FGF2	http://www.genome.jp/kegg-bin/show_pathway?hsa05167/hsa:3569%09red/hsa:2921%09red/hsa:2920%09red/hsa:3576%09red/hsa:4772%09red/hsa:2247%09red	img/hsa05167.html
Chemokine signaling pathway	KEGG PATHWAY	hsa04062	6	190	0.0661141	0.243578	CCL2|CXCL3|CXCL2|CCL5|CXCL8|CCL20	http://www.genome.jp/kegg-bin/show_pathway?hsa04062/hsa:2921%09red/hsa:2920%09red/hsa:6364%09red/hsa:3576%09red/hsa:6347%09red/hsa:6352%09red	img/hsa04062.html
T cell receptor signaling pathway	KEGG PATHWAY	hsa04660	4	103	0.0690313	0.24863	NFATC1|RASGRP1|LCK|TNF	http://www.genome.jp/kegg-bin/show_pathway?hsa04660/hsa:7124%09red/hsa:3932%09red/hsa:10125%09red/hsa:4772%09red	img/hsa04660.html
Linoleic acid metabolism	KEGG PATHWAY	hsa00591	2	29	0.0698531	0.24863	PLA2G4A|CYP1A2	http://www.genome.jp/kegg-bin/show_pathway?hsa00591/hsa:1544%09red/hsa:5321%09red	img/hsa00591.html
Caffeine metabolism	KEGG PATHWAY	hsa00232	1	5	0.0729154	0.255204	CYP1A2	http://www.genome.jp/kegg-bin/show_pathway?hsa00232/hsa:1544%09red	img/hsa00232.html
Antifolate resistance	KEGG PATHWAY	hsa01523	2	31	0.078487	0.265843	IL6|TNF	http://www.genome.jp/kegg-bin/show_pathway?hsa01523/hsa:7124%09red/hsa:3569%09red	img/hsa01523.html
Mucin type O-glycan biosynthesis	KEGG PATHWAY	hsa00512	2	31	0.078487	0.265843	GALNTL6|GALNT18	http://www.genome.jp/kegg-bin/show_pathway?hsa00512/hsa:374378%09red/hsa:442117%09red	img/hsa00512.html
mTOR signaling pathway	KEGG PATHWAY	hsa04150	5	153	0.0801293	0.267098	WNT10B|WNT7B|TNF|WNT9A|WNT4	http://www.genome.jp/kegg-bin/show_pathway?hsa04150/hsa:7124%09red/hsa:7477%09red/hsa:7483%09red/hsa:54361%09red/hsa:7480%09red	img/hsa04150.html
Staphylococcus aureus infection	KEGG PATHWAY	hsa05150	3	68	0.0821167	0.269445	C3AR1|CFB|DEFB4A	http://www.genome.jp/kegg-bin/show_pathway?hsa05150/hsa:629%09red/hsa:719%09red/hsa:1673%09red	img/hsa05150.html
Proteoglycans in cancer	KEGG PATHWAY	hsa05205	6	203	0.0848236	0.274046	WNT10B|WNT4|TNF|WNT9A|FGF2|WNT7B	http://www.genome.jp/kegg-bin/show_pathway?hsa05205/hsa:7477%09red/hsa:7124%09red/hsa:2247%09red/hsa:7483%09red/hsa:7480%09red/hsa:54361%09red	img/hsa05205.html
Apoptosis - multiple species	KEGG PATHWAY	hsa04215	2	33	0.0874349	0.275269	BIRC3|SEPTIN4	http://www.genome.jp/kegg-bin/show_pathway?hsa04215/hsa:330%09red/hsa:5414%09red	img/hsa04215.html
RIG-I-like receptor signaling pathway	KEGG PATHWAY	hsa04622	3	70	0.087824	0.275269	CXCL8|TNF|IL12A	http://www.genome.jp/kegg-bin/show_pathway?hsa04622/hsa:7124%09red/hsa:3576%09red/hsa:3592%09red	img/hsa04622.html
Toxoplasmosis	KEGG PATHWAY	hsa05145	4	113	0.08995	0.277787	TNF|BIRC3|IL10RA|IL12A	http://www.genome.jp/kegg-bin/show_pathway?hsa05145/hsa:7124%09red/hsa:330%09red/hsa:3587%09red/hsa:3592%09red	img/hsa05145.html
Cellular senescence	KEGG PATHWAY	hsa04218	5	160	0.0927495	0.282281	IL6|IL1A|CXCL8|NFATC1|GADD45G	http://www.genome.jp/kegg-bin/show_pathway?hsa04218/hsa:3569%09red/hsa:10912%09red/hsa:3552%09red/hsa:3576%09red/hsa:4772%09red
Leishmaniasis	KEGG PATHWAY	hsa05140	3	74	0.0997234	0.29917	IL1A|TNF|IL12A	http://www.genome.jp/kegg-bin/show_pathway?hsa05140/hsa:7124%09red/hsa:3552%09red/hsa:3592%09red	img/hsa05140.html
Thyroid cancer	KEGG PATHWAY	hsa05216	2	37	0.10617	0.314024	TCF7L1|GADD45G	http://www.genome.jp/kegg-bin/show_pathway?hsa05216/hsa:10912%09red/hsa:83439%09red	img/hsa05216.html
Allograft rejection	KEGG PATHWAY	hsa05330	2	38	0.111011	0.323781	TNF|IL12A	http://www.genome.jp/kegg-bin/show_pathway?hsa05330/hsa:7124%09red/hsa:3592%09red	img/hsa05330.html
EGFR tyrosine kinase inhibitor resistance	KEGG PATHWAY	hsa01521	3	79	0.115451	0.33212	NRG1|IL6|FGF2	http://www.genome.jp/kegg-bin/show_pathway?hsa01521/hsa:3569%09red/hsa:3084%09red/hsa:2247%09red	img/hsa01521.html
Colorectal cancer	KEGG PATHWAY	hsa05210	3	86	0.13891	0.394205	TCF7L1|EREG|GADD45G	http://www.genome.jp/kegg-bin/show_pathway?hsa05210/hsa:10912%09red/hsa:83439%09red/hsa:2069%09red	img/hsa05210.html
ABC transporters	KEGG PATHWAY	hsa02010	2	45	0.146344	0.409762	ABCA12|ABCC9	http://www.genome.jp/kegg-bin/show_pathway?hsa02010/hsa:10060%09red/hsa:26154%09red	img/hsa02010.html
Type II diabetes mellitus	KEGG PATHWAY	hsa04930	2	46	0.151567	0.418514	KCNJ11|TNF	http://www.genome.jp/kegg-bin/show_pathway?hsa04930/hsa:7124%09red/hsa:3767%09red	img/hsa04930.html
Measles	KEGG PATHWAY	hsa05162	4	138	0.153455	0.418514	IL6|CD209|IL12A|IL1A	http://www.genome.jp/kegg-bin/show_pathway?hsa05162/hsa:30835%09red/hsa:3569%09red/hsa:3552%09red/hsa:3592%09red	img/hsa05162.html
Morphine addiction	KEGG PATHWAY	hsa05032	3	91	0.156575	0.421549	KCNJ3|PDE11A|PDE7B	http://www.genome.jp/kegg-bin/show_pathway?hsa05032/hsa:3760%09red/hsa:27115%09red/hsa:50940%09red	img/hsa05032.html
Intestinal immune network for IgA production	KEGG PATHWAY	hsa04672	2	49	0.167449	0.439675	IL6|ICOSLG	http://www.genome.jp/kegg-bin/show_pathway?hsa04672/hsa:3569%09red/hsa:23308%09red	img/hsa04672.html
TGF-beta signaling pathway	KEGG PATHWAY	hsa04350	3	94	0.167495	0.439675	BAMBI|TNF|SMAD9	http://www.genome.jp/kegg-bin/show_pathway?hsa04350/hsa:7124%09red/hsa:4093%09red/hsa:25805%09red	img/hsa04350.html
Circadian entrainment	KEGG PATHWAY	hsa04713	3	97	0.178633	0.463123	PER3|KCNJ3|PER2	http://www.genome.jp/kegg-bin/show_pathway?hsa04713/hsa:3760%09red/hsa:8863%09red/hsa:8864%09red	img/hsa04713.html
Inflammatory mediator regulation of TRP channels	KEGG PATHWAY	hsa04750	3	100	0.18997	0.486508	NGF|PLA2G4A|TRPV3	http://www.genome.jp/kegg-bin/show_pathway?hsa04750/hsa:162514%09red/hsa:4803%09red/hsa:5321%09red	img/hsa04750.html
Oxytocin signaling pathway	KEGG PATHWAY	hsa04921	4	153	0.19785	0.500584	KCNJ3|NFATC1|PLA2G4A|CAMK1D	http://www.genome.jp/kegg-bin/show_pathway?hsa04921/hsa:57118%09red/hsa:3760%09red/hsa:5321%09red/hsa:4772%09red	img/hsa04921.html
Glycosphingolipid biosynthesis - ganglio series	KEGG PATHWAY	hsa00604	1	15	0.2033	0.504124	ST6GALNAC5	http://www.genome.jp/kegg-bin/show_pathway?hsa00604/hsa:81849%09red	img/hsa00604.html
Hepatitis C	KEGG PATHWAY	hsa05160	4	155	0.20405	0.504124	IFIT1|TNF|RSAD2|PPP2R2C	http://www.genome.jp/kegg-bin/show_pathway?hsa05160/hsa:5522%09red/hsa:7124%09red/hsa:3434%09red/hsa:91543%09red	img/hsa05160.html
Rap1 signaling pathway	KEGG PATHWAY	hsa04015	5	210	0.208215	0.508433	NGF|CSF1R|CSF1|FGF2|EPHA2	http://www.genome.jp/kegg-bin/show_pathway?hsa04015/hsa:4803%09red/hsa:2247%09red/hsa:1435%09red/hsa:1436%09red/hsa:1969%09red	img/hsa04015.html
Endometrial cancer	KEGG PATHWAY	hsa05213	2	58	0.21651	0.512491	TCF7L1|GADD45G	http://www.genome.jp/kegg-bin/show_pathway?hsa05213/hsa:10912%09red/hsa:83439%09red	img/hsa05213.html
Th17 cell differentiation	KEGG PATHWAY	hsa04659	3	107	0.217092	0.512491	IL6|NFATC1|LCK	http://www.genome.jp/kegg-bin/show_pathway?hsa04659/hsa:3569%09red/hsa:4772%09red/hsa:3932%09red	img/hsa04659.html
Insulin resistance	KEGG PATHWAY	hsa04931	3	108	0.221033	0.512491	IL6|TNF|SLC27A2	http://www.genome.jp/kegg-bin/show_pathway?hsa04931/hsa:7124%09red/hsa:3569%09red/hsa:11001%09red	img/hsa04931.html
Necroptosis	KEGG PATHWAY	hsa04217	4	162	0.226187	0.512491	IL1A|PLA2G4A|TNF|BIRC3	http://www.genome.jp/kegg-bin/show_pathway?hsa04217/hsa:7124%09red/hsa:330%09red/hsa:5321%09red/hsa:3552%09red	img/hsa04217.html
Jak-STAT signaling pathway	KEGG PATHWAY	hsa04630	4	162	0.226187	0.512491	IL6|IL10RA|IL12A|CSF3	http://www.genome.jp/kegg-bin/show_pathway?hsa04630/hsa:3569%09red/hsa:3587%09red/hsa:1440%09red/hsa:3592%09red	img/hsa04630.html
Phenylalanine metabolism	KEGG PATHWAY	hsa00360	1	17	0.227106	0.512491	AOC3	http://www.genome.jp/kegg-bin/show_pathway?hsa00360/hsa:8639%09red	img/hsa00360.html
Selenocompound metabolism	KEGG PATHWAY	hsa00450	1	17	0.227106	0.512491	SEPSECS	http://www.genome.jp/kegg-bin/show_pathway?hsa00450/hsa:51091%09red	img/hsa00450.html
Hepatitis B	KEGG PATHWAY	hsa05161	4	163	0.229401	0.512491	IL6|NFATC1|TNF|CXCL8	http://www.genome.jp/kegg-bin/show_pathway?hsa05161/hsa:7124%09red/hsa:3569%09red/hsa:3576%09red/hsa:4772%09red	img/hsa05161.html
2-Oxocarboxylic acid metabolism	KEGG PATHWAY	hsa01210	1	18	0.238744	0.527749	NAGS	http://www.genome.jp/kegg-bin/show_pathway?hsa01210/hsa:162417%09red	img/hsa01210.html
Cytosolic DNA-sensing pathway	KEGG PATHWAY	hsa04623	2	63	0.244317	0.530346	IL6|CCL5	http://www.genome.jp/kegg-bin/show_pathway?hsa04623/hsa:3569%09red/hsa:6352%09red	img/hsa04623.html
Glutamatergic synapse	KEGG PATHWAY	hsa04724	3	114	0.244969	0.530346	KCNJ3|PLA2G4A|GRIK5	http://www.genome.jp/kegg-bin/show_pathway?hsa04724/hsa:3760%09red/hsa:2901%09red/hsa:5321%09red	img/hsa04724.html
Sphingolipid signaling pathway	KEGG PATHWAY	hsa04071	3	119	0.265224	0.565669	TNF|PPP2R2C|MAP3K5	http://www.genome.jp/kegg-bin/show_pathway?hsa04071/hsa:4217%09red/hsa:5522%09red/hsa:7124%09red	img/hsa04071.html
Retinol metabolism	KEGG PATHWAY	hsa00830	2	67	0.266673	0.565669	CYP2S1|CYP1A2	http://www.genome.jp/kegg-bin/show_pathway?hsa00830/hsa:1544%09red/hsa:29785%09red	img/hsa00830.html
Fc epsilon RI signaling pathway	KEGG PATHWAY	hsa04664	2	68	0.272265	0.571757	PLA2G4A|TNF	http://www.genome.jp/kegg-bin/show_pathway?hsa04664/hsa:7124%09red/hsa:5321%09red	img/hsa04664.html
Axon guidance	KEGG PATHWAY	hsa04360	4	181	0.288927	0.586995	RND1|EPHA4|EPHA2|WNT4	http://www.genome.jp/kegg-bin/show_pathway?hsa04360/hsa:27289%09red/hsa:2043%09red/hsa:54361%09red/hsa:1969%09red	img/hsa04360.html
Renin-angiotensin system	KEGG PATHWAY	hsa04614	1	23	0.294375	0.586995	KLK1	http://www.genome.jp/kegg-bin/show_pathway?hsa04614/hsa:3816%09red	img/hsa04614.html
Mannose type O-glycan biosynthesis	KEGG PATHWAY	hsa00515	1	23	0.294375	0.586995	B3GAT1	http://www.genome.jp/kegg-bin/show_pathway?hsa00515/hsa:27087%09red	img/hsa00515.html
Melanoma	KEGG PATHWAY	hsa05218	2	72	0.294613	0.586995	FGF2|GADD45G	http://www.genome.jp/kegg-bin/show_pathway?hsa05218/hsa:10912%09red/hsa:2247%09red	img/hsa05218.html
p53 signaling pathway	KEGG PATHWAY	hsa04115	2	72	0.294613	0.586995	RPRM|GADD45G	http://www.genome.jp/kegg-bin/show_pathway?hsa04115/hsa:56475%09red/hsa:10912%09red	img/hsa04115.html
Platinum drug resistance	KEGG PATHWAY	hsa01524	2	73	0.300188	0.586995	BIRC3|MAP3K5	http://www.genome.jp/kegg-bin/show_pathway?hsa01524/hsa:4217%09red/hsa:330%09red	img/hsa01524.html
Glycosaminoglycan biosynthesis - heparan sulfate / heparin	KEGG PATHWAY	hsa00534	1	24	0.305007	0.586995	HS3ST1	http://www.genome.jp/kegg-bin/show_pathway?hsa00534/hsa:9957%09red	img/hsa00534.html
Purine metabolism	KEGG PATHWAY	hsa00230	3	130	0.310394	0.586995	PDE11A|PDE7B|ADPRM	http://www.genome.jp/kegg-bin/show_pathway?hsa00230/hsa:56985%09red/hsa:27115%09red/hsa:50940%09red	img/hsa00230.html
Pancreatic cancer	KEGG PATHWAY	hsa05212	2	75	0.311317	0.586995	ARHGEF6|GADD45G	http://www.genome.jp/kegg-bin/show_pathway?hsa05212/hsa:10912%09red/hsa:9459%09red	img/hsa05212.html
Glioma	KEGG PATHWAY	hsa05214	2	75	0.311317	0.586995	CAMK1D|GADD45G	http://www.genome.jp/kegg-bin/show_pathway?hsa05214/hsa:57118%09red/hsa:10912%09red	img/hsa05214.html
Biosynthesis of amino acids	KEGG PATHWAY	hsa01230	2	75	0.311317	0.586995	CPS1|NAGS	http://www.genome.jp/kegg-bin/show_pathway?hsa01230/hsa:1373%09red/hsa:162417%09red	img/hsa01230.html
alpha-Linolenic acid metabolism	KEGG PATHWAY	hsa00592	1	25	0.315481	0.586995	PLA2G4A	http://www.genome.jp/kegg-bin/show_pathway?hsa00592/hsa:5321%09red	img/hsa00592.html
Metabolism of xenobiotics by cytochrome P450	KEGG PATHWAY	hsa00980	2	76	0.316869	0.586995	CYP2S1|CYP1A2	http://www.genome.jp/kegg-bin/show_pathway?hsa00980/hsa:1544%09red/hsa:29785%09red	img/hsa00980.html
FoxO signaling pathway	KEGG PATHWAY	hsa04068	3	132	0.318655	0.586995	IL6|FBXO32|GADD45G	http://www.genome.jp/kegg-bin/show_pathway?hsa04068/hsa:3569%09red/hsa:10912%09red/hsa:114907%09red	img/hsa04068.html
Maturity onset diabetes of the young	KEGG PATHWAY	hsa04950	1	26	0.325798	0.594936	NKX2-2	http://www.genome.jp/kegg-bin/show_pathway?hsa04950/hsa:4821%09red	img/hsa04950.html
Complement and coagulation cascades	KEGG PATHWAY	hsa04610	2	79	0.333461	0.603679	C3AR1|CFB	http://www.genome.jp/kegg-bin/show_pathway?hsa04610/hsa:629%09red/hsa:719%09red	img/hsa04610.html
Phototransduction	KEGG PATHWAY	hsa04744	1	28	0.345972	0.620976	CNGB1	http://www.genome.jp/kegg-bin/show_pathway?hsa04744/hsa:1258%09red	img/hsa04744.html
Hippo signaling pathway - multiple species	KEGG PATHWAY	hsa04392	1	29	0.355834	0.633263	RASSF6	http://www.genome.jp/kegg-bin/show_pathway?hsa04392/hsa:166824%09red	img/hsa04392.html
ErbB signaling pathway	KEGG PATHWAY	hsa04012	2	85	0.366282	0.646379	NRG1|EREG	http://www.genome.jp/kegg-bin/show_pathway?hsa04012/hsa:3084%09red/hsa:2069%09red	img/hsa04012.html
Asthma	KEGG PATHWAY	hsa05310	1	31	0.375116	0.656453	TNF	http://www.genome.jp/kegg-bin/show_pathway?hsa05310/hsa:7124%09red	img/hsa05310.html
Hypertrophic cardiomyopathy (HCM)	KEGG PATHWAY	hsa05410	2	90	0.393162	0.677898	IL6|TNF	http://www.genome.jp/kegg-bin/show_pathway?hsa05410/hsa:7124%09red/hsa:3569%09red	img/hsa05410.html
beta-Alanine metabolism	KEGG PATHWAY	hsa00410	1	33	0.393826	0.677898	AOC3	http://www.genome.jp/kegg-bin/show_pathway?hsa00410/hsa:8639%09red	img/hsa00410.html
Small cell lung cancer	KEGG PATHWAY	hsa05222	2	93	0.409047	0.698373	BIRC3|GADD45G	http://www.genome.jp/kegg-bin/show_pathway?hsa05222/hsa:10912%09red/hsa:330%09red	img/hsa05222.html
Human T-cell leukemia virus 1 infection	KEGG PATHWAY	hsa05166	4	219	0.418862	0.699858	IL6|NFATC1|TNF|LCK	http://www.genome.jp/kegg-bin/show_pathway?hsa05166/hsa:7124%09red/hsa:3569%09red/hsa:4772%09red/hsa:3932%09red	img/hsa05166.html
Tyrosine metabolism	KEGG PATHWAY	hsa00350	1	36	0.420855	0.699858	AOC3	http://www.genome.jp/kegg-bin/show_pathway?hsa00350/hsa:8639%09red	img/hsa00350.html
Alanine, aspartate and glutamate metabolism	KEGG PATHWAY	hsa00250	1	36	0.420855	0.699858	CPS1	http://www.genome.jp/kegg-bin/show_pathway?hsa00250/hsa:1373%09red	img/hsa00250.html
Primary immunodeficiency	KEGG PATHWAY	hsa05340	1	37	0.429596	0.699858	LCK	http://www.genome.jp/kegg-bin/show_pathway?hsa05340/hsa:3932%09red	img/hsa05340.html
Prostate cancer	KEGG PATHWAY	hsa05215	2	97	0.429913	0.699858	TMPRSS2|TCF7L1	http://www.genome.jp/kegg-bin/show_pathway?hsa05215/hsa:83439%09red/hsa:7113%09red	img/hsa05215.html
Glycerophospholipid metabolism	KEGG PATHWAY	hsa00564	2	97	0.429913	0.699858	PLA2G4A|ADPRM	http://www.genome.jp/kegg-bin/show_pathway?hsa00564/hsa:56985%09red/hsa:5321%09red	img/hsa00564.html
Nicotine addiction	KEGG PATHWAY	hsa05033	1	40	0.455043	0.729458	CHRNB2	http://www.genome.jp/kegg-bin/show_pathway?hsa05033/hsa:1141%09red	img/hsa05033.html
Glycine, serine and threonine metabolism	KEGG PATHWAY	hsa00260	1	40	0.455043	0.729458	AOC3	http://www.genome.jp/kegg-bin/show_pathway?hsa00260/hsa:8639%09red	img/hsa00260.html
cGMP-PKG signaling pathway	KEGG PATHWAY	hsa04022	3	167	0.460859	0.731482	CNGB1|NFATC1|NPPC	http://www.genome.jp/kegg-bin/show_pathway?hsa04022/hsa:1258%09red/hsa:4772%09red/hsa:4880%09red	img/hsa04022.html
Bladder cancer	KEGG PATHWAY	hsa05219	1	41	0.463272	0.731482	CXCL8	http://www.genome.jp/kegg-bin/show_pathway?hsa05219/hsa:3576%09red	img/hsa05219.html
Tryptophan metabolism	KEGG PATHWAY	hsa00380	1	42	0.471378	0.738727	CYP1A2	http://www.genome.jp/kegg-bin/show_pathway?hsa00380/hsa:1544%09red	img/hsa00380.html
Alzheimer disease	KEGG PATHWAY	hsa05010	3	171	0.476437	0.741125	TNF|MAPT|ERN1	http://www.genome.jp/kegg-bin/show_pathway?hsa05010/hsa:7124%09red/hsa:2081%09red/hsa:4137%09red	img/hsa05010.html
Cholinergic synapse	KEGG PATHWAY	hsa04725	2	112	0.504495	0.778999	KCNJ3|CHRNB2	http://www.genome.jp/kegg-bin/show_pathway?hsa04725/hsa:1141%09red/hsa:3760%09red	img/hsa04725.html
Ether lipid metabolism	KEGG PATHWAY	hsa00565	1	47	0.510124	0.781942	PLA2G4A	http://www.genome.jp/kegg-bin/show_pathway?hsa00565/hsa:5321%09red	img/hsa00565.html
Notch signaling pathway	KEGG PATHWAY	hsa04330	1	48	0.517528	0.783575	JAG1	http://www.genome.jp/kegg-bin/show_pathway?hsa04330/hsa:182%09red	img/hsa04330.html
Serotonergic synapse	KEGG PATHWAY	hsa04726	2	115	0.518652	0.783575	KCNJ3|PLA2G4A	http://www.genome.jp/kegg-bin/show_pathway?hsa04726/hsa:3760%09red/hsa:5321%09red	img/hsa04726.html
Ovarian steroidogenesis	KEGG PATHWAY	hsa04913	1	49	0.524822	0.787233	PLA2G4A	http://www.genome.jp/kegg-bin/show_pathway?hsa04913/hsa:5321%09red	img/hsa04913.html
Endocrine and other factor-regulated calcium reabsorption	KEGG PATHWAY	hsa04961	1	50	0.532006	0.792349	KLK1	http://www.genome.jp/kegg-bin/show_pathway?hsa04961/hsa:3816%09red	img/hsa04961.html
Neurotrophin signaling pathway	KEGG PATHWAY	hsa04722	2	119	0.537111	0.794319	NGF|MAP3K5	http://www.genome.jp/kegg-bin/show_pathway?hsa04722/hsa:4217%09red/hsa:4803%09red	img/hsa04722.html
Platelet activation	KEGG PATHWAY	hsa04611	2	124	0.5595	0.821644	PLA2G4A|RASGRP1	http://www.genome.jp/kegg-bin/show_pathway?hsa04611/hsa:10125%09red/hsa:5321%09red	img/hsa04611.html
Focal adhesion	KEGG PATHWAY	hsa04510	3	199	0.579044	0.831904	BIRC3|PARVA|THBS2	http://www.genome.jp/kegg-bin/show_pathway?hsa04510/hsa:55742%09red/hsa:330%09red/hsa:7058%09red	img/hsa04510.html
Epstein-Barr virus infection	KEGG PATHWAY	hsa05169	3	201	0.585887	0.831904	IL6|TNF|GADD45G	http://www.genome.jp/kegg-bin/show_pathway?hsa05169/hsa:7124%09red/hsa:3569%09red/hsa:10912%09red	img/hsa05169.html
Dopaminergic synapse	KEGG PATHWAY	hsa04728	2	131	0.589546	0.831904	KCNJ3|PPP2R2C	http://www.genome.jp/kegg-bin/show_pathway?hsa04728/hsa:5522%09red/hsa:3760%09red	img/hsa04728.html
VEGF signaling pathway	KEGG PATHWAY	hsa04370	1	59	0.592002	0.831904	PLA2G4A	http://www.genome.jp/kegg-bin/show_pathway?hsa04370/hsa:5321%09red	img/hsa04370.html
Lysine degradation	KEGG PATHWAY	hsa00310	1	59	0.592002	0.831904	PLOD2	http://www.genome.jp/kegg-bin/show_pathway?hsa00310/hsa:5352%09red	img/hsa00310.html
Vascular smooth muscle contraction	KEGG PATHWAY	hsa04270	2	132	0.593714	0.831904	PLA2G4A|NPPC	http://www.genome.jp/kegg-bin/show_pathway?hsa04270/hsa:5321%09red/hsa:4880%09red	img/hsa04270.html
Steroid hormone biosynthesis	KEGG PATHWAY	hsa00140	1	60	0.598178	0.831904	CYP1A2	http://www.genome.jp/kegg-bin/show_pathway?hsa00140/hsa:1544%09red	img/hsa00140.html
Long-term depression	KEGG PATHWAY	hsa04730	1	60	0.598178	0.831904	PLA2G4A	http://www.genome.jp/kegg-bin/show_pathway?hsa04730/hsa:5321%09red	img/hsa04730.html
Herpes simplex virus 1 infection	KEGG PATHWAY	hsa05168	7	492	0.614673	0.845705	CCL2|CCL5|BIRC3|IL12A|IL6|PILRA|TNF	http://www.genome.jp/kegg-bin/show_pathway?hsa05168/hsa:3569%09red/hsa:3592%09red/hsa:7124%09red/hsa:6347%09red/hsa:29992%09red/hsa:6352%09red/hsa:330%09red	img/hsa05168.html
Arachidonic acid metabolism	KEGG PATHWAY	hsa00590	1	63	0.616156	0.845705	PLA2G4A	http://www.genome.jp/kegg-bin/show_pathway?hsa00590/hsa:5321%09red	img/hsa00590.html
Non-small cell lung cancer	KEGG PATHWAY	hsa05223	1	66	0.633336	0.858069	GADD45G	http://www.genome.jp/kegg-bin/show_pathway?hsa05223/hsa:10912%09red	img/hsa05223.html
Aminoacyl-tRNA biosynthesis	KEGG PATHWAY	hsa00970	1	66	0.633336	0.858069	SEPSECS	http://www.genome.jp/kegg-bin/show_pathway?hsa00970/hsa:51091%09red	img/hsa00970.html
Shigellosis	KEGG PATHWAY	hsa05131	1	68	0.644364	0.8612	CXCL8	http://www.genome.jp/kegg-bin/show_pathway?hsa05131/hsa:3576%09red	img/hsa05131.html
Adipocytokine signaling pathway	KEGG PATHWAY	hsa04920	1	69	0.649754	0.8612	TNF	http://www.genome.jp/kegg-bin/show_pathway?hsa04920/hsa:7124%09red	img/hsa04920.html
Prolactin signaling pathway	KEGG PATHWAY	hsa04917	1	70	0.655063	0.8612	TNFRSF11A	http://www.genome.jp/kegg-bin/show_pathway?hsa04917/hsa:8792%09red	img/hsa04917.html
Phospholipase D signaling pathway	KEGG PATHWAY	hsa04072	2	148	0.656152	0.8612	CXCL8|PLA2G4A	http://www.genome.jp/kegg-bin/show_pathway?hsa04072/hsa:5321%09red/hsa:3576%09red	img/hsa04072.html
Retrograde endocannabinoid signaling	KEGG PATHWAY	hsa04723	2	148	0.656152	0.8612	KCNJ3|RIMS1	http://www.genome.jp/kegg-bin/show_pathway?hsa04723/hsa:22999%09red/hsa:3760%09red	img/hsa04723.html
Adherens junction	KEGG PATHWAY	hsa04520	1	72	0.665442	0.862569	TCF7L1	http://www.genome.jp/kegg-bin/show_pathway?hsa04520/hsa:83439%09red	img/hsa04520.html
Drug metabolism - cytochrome P450	KEGG PATHWAY	hsa00982	1	72	0.665442	0.862569	CYP1A2	http://www.genome.jp/kegg-bin/show_pathway?hsa00982/hsa:1544%09red	img/hsa00982.html
Phagosome	KEGG PATHWAY	hsa04145	2	152	0.670526	0.862569	CD209|THBS2	http://www.genome.jp/kegg-bin/show_pathway?hsa04145/hsa:30835%09red/hsa:7058%09red	img/hsa04145.html
Bacterial invasion of epithelial cells	KEGG PATHWAY	hsa05100	1	74	0.675512	0.862569	SEPTIN3	http://www.genome.jp/kegg-bin/show_pathway?hsa05100/hsa:55964%09red	img/hsa05100.html
PPAR signaling pathway	KEGG PATHWAY	hsa03320	1	76	0.685281	0.862569	SLC27A2	http://www.genome.jp/kegg-bin/show_pathway?hsa03320/hsa:11001%09red	img/hsa03320.html
Chronic myeloid leukemia	KEGG PATHWAY	hsa05220	1	76	0.685281	0.862569	GADD45G	http://www.genome.jp/kegg-bin/show_pathway?hsa05220/hsa:10912%09red	img/hsa05220.html
Arrhythmogenic right ventricular cardiomyopathy (ARVC)	KEGG PATHWAY	hsa05412	1	77	0.690055	0.862569	TCF7L1	http://www.genome.jp/kegg-bin/show_pathway?hsa05412/hsa:83439%09red	img/hsa05412.html
Antigen processing and presentation	KEGG PATHWAY	hsa04612	1	77	0.690055	0.862569	TNF	http://www.genome.jp/kegg-bin/show_pathway?hsa04612/hsa:7124%09red	img/hsa04612.html
Synaptic vesicle cycle	KEGG PATHWAY	hsa04721	1	78	0.694758	0.863309	RIMS1	http://www.genome.jp/kegg-bin/show_pathway?hsa04721/hsa:22999%09red	img/hsa04721.html
RNA degradation	KEGG PATHWAY	hsa03018	1	79	0.69939	0.863952	BTG4	http://www.genome.jp/kegg-bin/show_pathway?hsa03018/hsa:54766%09red	img/hsa03018.html
B cell receptor signaling pathway	KEGG PATHWAY	hsa04662	1	82	0.712872	0.865624	NFATC1	http://www.genome.jp/kegg-bin/show_pathway?hsa04662/hsa:4772%09red	img/hsa04662.html
Chemical carcinogenesis	KEGG PATHWAY	hsa05204	1	82	0.712872	0.865624	CYP1A2	http://www.genome.jp/kegg-bin/show_pathway?hsa05204/hsa:1544%09red	img/hsa05204.html
Protein processing in endoplasmic reticulum	KEGG PATHWAY	hsa04141	2	165	0.713931	0.865624	ERN1|MAP3K5	http://www.genome.jp/kegg-bin/show_pathway?hsa04141/hsa:4217%09red/hsa:2081%09red	img/hsa04141.html
Peroxisome	KEGG PATHWAY	hsa04146	1	83	0.717231	0.865624	SLC27A2	http://www.genome.jp/kegg-bin/show_pathway?hsa04146/hsa:11001%09red	img/hsa04146.html
Tight junction	KEGG PATHWAY	hsa04530	2	170	0.729317	0.866006	PPP2R2C|MAP3K5	http://www.genome.jp/kegg-bin/show_pathway?hsa04530/hsa:4217%09red/hsa:5522%09red	img/hsa04530.html
Insulin secretion	KEGG PATHWAY	hsa04911	1	86	0.72992	0.866006	KCNJ11	http://www.genome.jp/kegg-bin/show_pathway?hsa04911/hsa:3767%09red	img/hsa04911.html
ECM-receptor interaction	KEGG PATHWAY	hsa04512	1	86	0.72992	0.866006	THBS2	http://www.genome.jp/kegg-bin/show_pathway?hsa04512/hsa:7058%09red	img/hsa04512.html
GABAergic synapse	KEGG PATHWAY	hsa04727	1	89	0.742043	0.874795	SLC38A5	http://www.genome.jp/kegg-bin/show_pathway?hsa04727/hsa:92745%09red	img/hsa04727.html
Protein digestion and absorption	KEGG PATHWAY	hsa04974	1	90	0.745963	0.874795	COL24A1	http://www.genome.jp/kegg-bin/show_pathway?hsa04974/hsa:255631%09red	img/hsa04974.html
mRNA surveillance pathway	KEGG PATHWAY	hsa03015	1	91	0.749824	0.874795	PPP2R2C	http://www.genome.jp/kegg-bin/show_pathway?hsa03015/hsa:5522%09red	img/hsa03015.html
GnRH signaling pathway	KEGG PATHWAY	hsa04912	1	93	0.757372	0.878148	PLA2G4A	http://www.genome.jp/kegg-bin/show_pathway?hsa04912/hsa:5321%09red	img/hsa04912.html
Fc gamma R-mediated phagocytosis	KEGG PATHWAY	hsa04666	1	94	0.761061	0.878148	PLA2G4A	http://www.genome.jp/kegg-bin/show_pathway?hsa04666/hsa:5321%09red	img/hsa04666.html
Dilated cardiomyopathy (DCM)	KEGG PATHWAY	hsa05414	1	96	0.768273	0.879164	TNF	http://www.genome.jp/kegg-bin/show_pathway?hsa05414/hsa:7124%09red	img/hsa05414.html
Aldosterone synthesis and secretion	KEGG PATHWAY	hsa04925	1	98	0.775269	0.879164	CAMK1D	http://www.genome.jp/kegg-bin/show_pathway?hsa04925/hsa:57118%09red	img/hsa04925.html
Endocrine resistance	KEGG PATHWAY	hsa01522	1	98	0.775269	0.879164	JAG1	http://www.genome.jp/kegg-bin/show_pathway?hsa01522/hsa:182%09red	img/hsa01522.html
Choline metabolism in cancer	KEGG PATHWAY	hsa05231	1	99	0.778688	0.879164	PLA2G4A	http://www.genome.jp/kegg-bin/show_pathway?hsa05231/hsa:5321%09red	img/hsa05231.html
HIF-1 signaling pathway	KEGG PATHWAY	hsa04066	1	109	0.810165	0.908934	IL6	http://www.genome.jp/kegg-bin/show_pathway?hsa04066/hsa:3569%09red	img/hsa04066.html
Leukocyte transendothelial migration	KEGG PATHWAY	hsa04670	1	112	0.818712	0.908934	ESAM	http://www.genome.jp/kegg-bin/show_pathway?hsa04670/hsa:90952%09red	img/hsa04670.html
Carbon metabolism	KEGG PATHWAY	hsa01200	1	117	0.832116	0.908934	CPS1	http://www.genome.jp/kegg-bin/show_pathway?hsa01200/hsa:1373%09red	img/hsa01200.html
Human immunodeficiency virus 1 infection	KEGG PATHWAY	hsa05170	2	212	0.832917	0.908934	NFATC1|TNF	http://www.genome.jp/kegg-bin/show_pathway?hsa05170/hsa:7124%09red/hsa:4772%09red
cAMP signaling pathway	KEGG PATHWAY	hsa04024	2	214	0.83683	0.908934	CNGB1|NFATC1	http://www.genome.jp/kegg-bin/show_pathway?hsa04024/hsa:1258%09red/hsa:4772%09red	img/hsa04024.html
Regulation of actin cytoskeleton	KEGG PATHWAY	hsa04810	2	214	0.83683	0.908934	ARHGEF6|FGF2	http://www.genome.jp/kegg-bin/show_pathway?hsa04810/hsa:9459%09red/hsa:2247%09red	img/hsa04810.html
Thyroid hormone signaling pathway	KEGG PATHWAY	hsa04919	1	119	0.837198	0.908934	WNT4	http://www.genome.jp/kegg-bin/show_pathway?hsa04919/hsa:54361%09red	img/hsa04919.html
AMPK signaling pathway	KEGG PATHWAY	hsa04152	1	120	0.839682	0.908934	PPP2R2C	http://www.genome.jp/kegg-bin/show_pathway?hsa04152/hsa:5522%09red	img/hsa04152.html
Cell cycle	KEGG PATHWAY	hsa04110	1	124	0.849246	0.914573	GADD45G	http://www.genome.jp/kegg-bin/show_pathway?hsa04110/hsa:10912%09red	img/hsa04110.html
Autophagy - animal	KEGG PATHWAY	hsa04140	1	128	0.858244	0.919547	ERN1	http://www.genome.jp/kegg-bin/show_pathway?hsa04140/hsa:2081%09red	img/hsa04140.html
Systemic lupus erythematosus	KEGG PATHWAY	hsa05322	1	133	0.868746	0.9224	TNF	http://www.genome.jp/kegg-bin/show_pathway?hsa05322/hsa:7124%09red	img/hsa05322.html
Ubiquitin mediated proteolysis	KEGG PATHWAY	hsa04120	1	137	0.87659	0.9224	BIRC3	http://www.genome.jp/kegg-bin/show_pathway?hsa04120/hsa:330%09red	img/hsa04120.html
Apelin signaling pathway	KEGG PATHWAY	hsa04371	1	137	0.87659	0.9224	JAG1	http://www.genome.jp/kegg-bin/show_pathway?hsa04371/hsa:182%09red	img/hsa04371.html
Estrogen signaling pathway	KEGG PATHWAY	hsa04915	1	138	0.878477	0.9224	KCNJ3	http://www.genome.jp/kegg-bin/show_pathway?hsa04915/hsa:3760%09red	img/hsa04915.html
Neuroactive ligand-receptor interaction	KEGG PATHWAY	hsa04080	3	338	0.888976	0.928781	C3AR1|CHRNB2|GRIK5	http://www.genome.jp/kegg-bin/show_pathway?hsa04080/hsa:719%09red/hsa:1141%09red/hsa:2901%09red	img/hsa04080.html
Adrenergic signaling in cardiomyocytes	KEGG PATHWAY	hsa04261	1	149	0.897437	0.932979	PPP2R2C	http://www.genome.jp/kegg-bin/show_pathway?hsa04261/hsa:5522%09red	img/hsa04261.html
Ribosome	KEGG PATHWAY	hsa03010	1	153	0.903579	0.934736	RPS4Y1	http://www.genome.jp/kegg-bin/show_pathway?hsa03010/hsa:6192%09red	img/hsa03010.html
RNA transport	KEGG PATHWAY	hsa03013	1	165	0.919898	0.946954	EIF1AY	http://www.genome.jp/kegg-bin/show_pathway?hsa03013/hsa:9086%09red	img/hsa03013.html
Metabolic pathways	KEGG PATHWAY	hsa01100	16	1432	0.930208	0.952896	PLA2G4A|CA9|GALNTL6|NAGS|CA12|GALNT18|CPS1|AOC3|PDE7B|SEPSECS|CYP1A2|CYP2S1|PDE11A|B3GAT1|ST6GALNAC5|ADPRM	http://www.genome.jp/kegg-bin/show_pathway?hsa01100/hsa:771%09red/hsa:51091%09red/hsa:29785%09red/hsa:5321%09red/hsa:27087%09red/hsa:27115%09red/hsa:374378%09red/hsa:442117%09red/hsa:1373%09red/hsa:56985%09red/hsa:768%09red/hsa:81849%09red/hsa:50940%09red/hsa:1544%09red/hsa:8639%09red/hsa:162417%09red	img/hsa01100.html
Alcoholism	KEGG PATHWAY	hsa05034	1	180	0.936496	0.95468	PKIA	http://www.genome.jp/kegg-bin/show_pathway?hsa05034/hsa:5569%09red	img/hsa05034.html
Calcium signaling pathway	KEGG PATHWAY	hsa04020	1	193	0.948091	0.961831	CAMK1D	http://www.genome.jp/kegg-bin/show_pathway?hsa04020/hsa:57118%09red	img/hsa04020.html
Thermogenesis	KEGG PATHWAY	hsa04714	1	231	0.971263	0.980602	MAP3K5	http://www.genome.jp/kegg-bin/show_pathway?hsa04714/hsa:4217%09red
Endocytosis	KEGG PATHWAY	hsa04144	1	244	0.976542	0.981214	RNF41	http://www.genome.jp/kegg-bin/show_pathway?hsa04144/hsa:10193%09red	img/hsa04144.html
Olfactory transduction	KEGG PATHWAY	hsa04740	1	445	0.999028	0.999028	CNGB1	http://www.genome.jp/kegg-bin/show_pathway?hsa04740/hsa:1258%09red	img/hsa04740.html
